# Supplementary material for: A Regulatory Hierarchy Controls the Dynamic Transcriptional Response to Extreme Oxidative Stress in Archaea
Source: PLoS Genet. 2015 Jan 8;11(1):e1004912. doi: 10.1371/journal.pgen.1004912 (PMC4287449; doi:10.1371/journal.pgen.1004912)
Supplement: S2 Table — Expression data and associated RosR binding sites for each gene. Contains binding location coordinates, coordinate-to-gene distances, and binding peak p-values for each gene at each time point. (XLS) [file pgen.1004912.s002.xls]

## Sheet: Legend
Supplementary Table S2. Gene expression and ChIP-chip data for each of the 252 loci bound by RosR
Column name	Definition
gene	Gene unique identifier (detailed annotations given in Supplementary Table 3)
ge0.ura	Gene expression ratio of ∆ura3 parent strain under standard conditions (non-stress) just prior to H2O2 exposure vs. NRC-1 wild type strain grown to mid-logarhitmic phase (see also Sharma et al., 2012, and Gene Expression Omnibus accession GSE33980 for details)
ge10.ura	Gene expression in ∆ura3 parent strain 10 minutes after H2O2 exposure
ge20.ura	Gene expression in ∆ura3 parent strain 20 minutes after H2O2 exposure
ge60.ura	Gene expression in ∆ura3 parent strain 60 minutes after H2O2 exposure
noH2O2.Pk.pval	P-value of significance of RosR ChIP-chip binding peak in the absence of H2O2 (0 minutes, just prior to H2O2 addition). P-values for positions detected in more than one biological replicate are combined using Fisher's test (see also Methods)
noH2O2.Chr	Chromosomal element on which the locus of interest is located in the absence of H2O2 (Chromosomal elements are one of: Chr, chromosome; pNRC100, megaplasmid 1; pNRC200, megaplasmid 2)
noH2O2.Pk.coord.avg	Genomic coordinate position of the RosR binding peak in the absence of H2O2, with position of closely clustered peaks averaged across biological replicates
noH2O2.Pk.coord.min	Genomic coordinate position of the RosR binding peak in the absence of H2O2, 5'-most position out of all replicate peaks
noH2O2.Pk.coord.max	Genomic coordinate position of the RosR binding peak in the absence of H2O2, 3'-most position out of all replicate peaks
noH2O2.Pk.intens.avg	Intensity (ratio of immunoprecipitated vs whole cell extract mock control) of RosR binding peak in the absence of H2O2, averaged across closely clustered peaks
noH2O2.Pk.intens.min	Intensity (ratio of immunoprecipitated vs whole cell extract mock control) of RosR binding peak in the absence of H2O2, minimum intensity across closely clustered peaks
noH2O2.Pk.intens.max	Intensity (ratio of immunoprecipitated vs whole cell extract mock control) of RosR binding peak in the absence of H2O2, maximum intensity across closely clustered peaks
noH2O2.Dist.avg	Distance of the RosR binding peak in the absence of H2O2 to the start site of the closest gene, averaged across closely clustered replicate peaks
noH2O2.Distance.min	Distance of the RosR binding peak in the absence of H2O2 to the start site of the closest gene, minimum of closely clustered replicate peaks
noH2O2.Distance.max	Distance of the RosR binding peak in the absence of H2O2 to the start site of the closest gene, maximum of closely clustered replicate peaks
wH2O2_10m.Pk.pval	P-value of significance of RosR ChIP-chip binding peak 10 minutes after the addition of H2O2
wH2O2_10m.Chr	Chromosomal element on which the locus of interest is located 10 minutes after the addition of H2O2 (Chromosomal elements are one of: Chr, chromosome; pNRC100, megaplasmid 1; pNRC200, megaplasmid 2)
wH2O2_10m.Pk.coord.avg	Genomic coordinate position of the RosR binding peak 10 minutes after the addition of H2O2, with position of closely clustered peaks averaged across biological replicates
wH2O2_10m.Pk.coord.min	Genomic coordinate position of the RosR binding peak 10 minutes after the addition of H2O2, 5'-most position out of all replicate peaks
wH2O2_10m.Pk.coord.max	Genomic coordinate position of the RosR binding peak 10 minutes after the addition of H2O2, 3'-most position out of all replicate peaks
wH2O2_10m.Pk.intens.avg	Intensity (ratio of immunoprecipitated vs whole cell extract mock control) of RosR binding peak 10 minutes after the addition of H2O2, averaged across closely clustered peaks
wH2O2_10m.Pk.intens.min	Intensity (ratio of immunoprecipitated vs whole cell extract mock control) of RosR binding peak 10 minutes after the addition of H2O2, minimum intensity across closely clustered peaks
wH2O2_10m.Pk.intens.max	Intensity (ratio of immunoprecipitated vs whole cell extract mock control) of RosR binding peak 10 minutes after the addition of H2O2, maximum intensity across closely clustered peaks
wH2O2_10m.Dist.avg	Distance of the RosR binding peak to the start site of the closest gene 10 minutes after the addition of H2O2, averaged across closely clustered replicate peaks
wH2O2_10m.Distance.min	Distance of the RosR binding peak to the start site of the closest gene 10 minutes after the addition of H2O2, minimum of closely clustered replicate peaks
wH2O2_10m.Distance.max	Distance of the RosR binding peak to the start site of the closest gene 10 minutes after the addition of H2O2, maximum of closely clustered replicate peaks
wH2O2_20m.Pk.pval	P-value of significance of RosR ChIP-chip binding peak 20 minutes after the addition of H2O2
wH2O2_20m.Chr	Chromosomal element on which the locus of interest is located 20 minutes after the addition of H2O2 (Chromosomal elements are one of: Chr, chromosome; pNRC100, megaplasmid 1; pNRC200, megaplasmid 2)
wH2O2_20m.Pk.coord.avg	Genomic coordinate position of the RosR binding peak 20 minutes after the addition of H2O2, with position of closely clustered peaks averaged across biological replicates
wH2O2_20m.Pk.coord.min	Genomic coordinate position of the RosR binding peak 20 minutes after the addition of H2O2, 5'-most position out of all replicate peaks
wH2O2_20m.Pk.coord.max	Genomic coordinate position of the RosR binding peak 20 minutes after the addition of H2O2, 3'-most position out of all replicate peaks
wH2O2_20m.Pk.intens.avg	Intensity (ratio of immunoprecipitated vs whole cell extract mock control) of RosR binding peak 20 minutes after the addition of H2O2, averaged across closely clustered peaks
wH2O2_20m.Pk.intens.min	Intensity (ratio of immunoprecipitated vs whole cell extract mock control) of RosR binding peak 20 minutes after the addition of H2O2, minimum intensity across closely clustered peaks
wH2O2_20m.Pk.intens.max	Intensity (ratio of immunoprecipitated vs whole cell extract mock control) of RosR binding peak 20 minutes after the addition of H2O2, maximum intensity across closely clustered peaks
wH2O2_20m.Dist.avg	Distance of the RosR binding peak to the start site of the closest gene 20 minutes after the addition of H2O2, averaged across closely clustered replicate peaks
wH2O2_20m.Distance.min	Distance of the RosR binding peak to the start site of the closest gene 20 minutes after the addition of H2O2, minimum of closely clustered replicate peaks
wH2O2_20m.Distance.max	Distance of the RosR binding peak to the start site of the closest gene 20 minutes after the addition of H2O2, maximum of closely clustered replicate peaks
wH2O2_60m.Pk.pval	P-value of significance of RosR ChIP-chip binding peak 60 minutes after the addition of H2O2
wH2O2_60m.Chr	Chromosomal element on which the locus of interest is located 60 minutes after the addition of H2O2 (Chromosomal elements are one of: Chr, chromosome; pNRC100, megaplasmid 1; pNRC200, megaplasmid 2)
wH2O2_60m.Pk.coord.avg	Genomic coordinate position of the RosR binding peak 60 minutes after the addition of H2O2, with position of closely clustered peaks averaged across biological replicates
wH2O2_60m.Pk.coord.min	Genomic coordinate position of the RosR binding peak 60 minutes after the addition of H2O2, 5'-most position out of all replicate peaks
wH2O2_60m.Pk.coord.max	Genomic coordinate position of the RosR binding peak 60 minutes after the addition of H2O2, 3'-most position out of all replicate peaks
wH2O2_60m.Pk.intens.avg	Intensity (ratio of immunoprecipitated vs whole cell extract mock control) of RosR binding peak 60 minutes after the addition of H2O2, averaged across closely clustered peaks
wH2O2_60m.Pk.intens.min	Intensity (ratio of immunoprecipitated vs whole cell extract mock control) of RosR binding peak 60 minutes after the addition of H2O2, minimum intensity across closely clustered peaks
wH2O2_60m.Pk.intens.max	Intensity (ratio of immunoprecipitated vs whole cell extract mock control) of RosR binding peak 60 minutes after the addition of H2O2, maximum intensity across closely clustered peaks
wH2O2_60m.Dist.avg	Distance of the RosR binding peak to the start site of the closest gene 60 minutes after the addition of H2O2, averaged across closely clustered replicate peaks
wH2O2_60m.Distance.min	Distance of the RosR binding peak to the start site of the closest gene 60 minutes after the addition of H2O2, minimum of closely clustered replicate peaks
wH2O2_60m.Distance.max	Distance of the RosR binding peak to the start site of the closest gene 60 minutes after the addition of H2O2, maximum of closely clustered replicate peaks

## Sheet: Supplementary_Table S2
Supplementary Table S2. Gene expression and ChIP-chip data for each of the 252 loci bound by RosR
gene	ge0.ura	ge10.ura	ge20.ura	ge60.ura	noH2O2.Pk.pval	noH2O2.Chr	noH2O2.Pk.coord.avg	noH2O2.Pk.coord.min	noH2O2.Pk.coord.max	noH2O2.Pk.intens.avg	noH2O2.Pk.intens.min	noH2O2.Pk.intens.max	noH2O2.Dist.avg	noH2O2.Distance.min	noH2O2.Distance.max	wH2O2_10m.Pk.pval	wH2O2_10m.Chr	wH2O2_10m.Pk.coord.avg	wH2O2_10m.Pk.coord.min	wH2O2_10m.Pk.coord.max	wH2O2_10m.Pk.intens.avg	wH2O2_10m.Pk.intens.min	wH2O2_10m.Pk.intens.max	wH2O2_10m.Dist.avg	wH2O2_10m.Distance.min	wH2O2_10m.Distance.max	wH2O2_20m.Pk.pval	wH2O2_20m.Chr	wH2O2_20m.Pk.coord.avg	wH2O2_20m.Pk.coord.min	wH2O2_20m.Pk.coord.max	wH2O2_20m.Pk.intens.avg	wH2O2_20m.Pk.intens.min	wH2O2_20m.Pk.intens.max	wH2O2_20m.Dist.avg	wH2O2_20m.Distance.min	wH2O2_20m.Distance.max	wH2O2_60m.Pk.pval	wH2O2_60m.Chr	wH2O2_60m.Pk.coord.avg	wH2O2_60m.Pk.coord.min	wH2O2_60m.Pk.coord.max	wH2O2_60m.Pk.intens.avg	wH2O2_60m.Pk.intens.min	wH2O2_60m.Pk.intens.max	wH2O2_60m.Dist.avg	wH2O2_60m.Distance.min	wH2O2_60m.Distance.max
VNG0016H	-0.0361726	-0.0211114	0.0188731	-0.0717953	0.00451849	Chr	14365.3	14292	14422	1.70833	1.365	1.992	185.333	112	242	0.316228	NA	NA	NA	NA	0.114	0.114	0.114	NA	NA	NA	0.23589	Chr	14412	14412	14412	0.861	0.861	0.861	232	232	232	0.316228	NA	NA	NA	NA	0.114	0.114	0.114	NA	NA	NA
VNG0017H	-0.028143	-0.0528614	-0.00143087	-0.0228052	0.00451849	Chr	14365.3	14292	14422	1.70833	1.365	1.992	118.667	62	192	0.316228	NA	NA	NA	NA	0.114	0.114	0.114	NA	NA	NA	0.23589	Chr	14412	14412	14412	0.861	0.861	0.861	72	72	72	0.316228	NA	NA	NA	NA	0.114	0.114	0.114	NA	NA	NA
VNG0020H	0.00792676	-0.0957367	-0.0911486	0.0392395	0.00209137	Chr	16149.5	16032	16267	1.6765	0.75	2.603	98	-20	216	0.316228	NA	NA	NA	NA	0.114	0.114	0.114	NA	NA	NA	0.316228	NA	NA	NA	NA	0.114	0.114	0.114	NA	NA	NA	0.316228	NA	NA	NA	NA	0.114	0.114	0.114	NA	NA	NA
VNG0030H	0.00224201	-0.0777077	-0.0635971	0.0280908	0.00982759	Chr	26047	26012	26082	1.5675	0.833	2.302	155	120	190	0.316228	NA	NA	NA	NA	0.114	0.114	0.114	NA	NA	NA	0.316228	NA	NA	NA	NA	0.114	0.114	0.114	NA	NA	NA	0.316228	NA	NA	NA	NA	0.114	0.114	0.114	NA	NA	NA
VNG0032H	0.00557053	-0.251617	-0.330869	-0.264382	0.00267593	Chr	29219.5	29152	29282	1.56575	0.883	2.108	-173.5	-236	-106	0.316228	NA	NA	NA	NA	0.114	0.114	0.114	NA	NA	NA	0.316228	NA	NA	NA	NA	0.114	0.114	0.114	NA	NA	NA	0.316228	NA	NA	NA	NA	0.114	0.114	0.114	NA	NA	NA
VNG0037H	-0.0332328	-0.121987	-0.0995576	0.0184743	0.04853	Chr	31762	31762	31762	0.496	0.496	0.496	76	76	76	0.316228	NA	NA	NA	NA	0.114	0.114	0.114	NA	NA	NA	0.316228	NA	NA	NA	NA	0.114	0.114	0.114	NA	NA	NA	0.316228	NA	NA	NA	NA	0.114	0.114	0.114	NA	NA	NA
VNG0038H	-0.0588568	-0.146112	0.0266866	0.0181493	0.04853	Chr	31762	31762	31762	0.496	0.496	0.496	76	76	76	0.316228	NA	NA	NA	NA	0.114	0.114	0.114	NA	NA	NA	0.316228	NA	NA	NA	NA	0.114	0.114	0.114	NA	NA	NA	0.316228	NA	NA	NA	NA	0.114	0.114	0.114	NA	NA	NA
VNG0039H	0.0102653	-0.134338	-0.109721	-0.00182437	0.042373	Chr	32816.3	32682	32935	1.46567	0.905	2.251	-73.6667	-208	45	0.316228	NA	NA	NA	NA	0.114	0.114	0.114	NA	NA	NA	0.316228	NA	NA	NA	NA	0.114	0.114	0.114	NA	NA	NA	0.316228	NA	NA	NA	NA	0.114	0.114	0.114	NA	NA	NA
VNG0043H	-0.0478823	-0.0289724	-0.00321996	0.0542006	0.00671976	Chr	36298.7	36222	36402	1.62	0.955	2.645	23.3333	-80	100	0.316228	NA	NA	NA	NA	0.114	0.114	0.114	NA	NA	NA	0.30956	Chr	36272	36272	36272	0.668	0.668	0.668	50	50	50	0.316228	NA	NA	NA	NA	0.114	0.114	0.114	NA	NA	NA
VNG0045C	0.0822029	0.166042	0.0385427	0.658614	0.02157	Chr	38202	38202	38202	0.929	0.929	0.929	-184	-184	-184	0.316228	NA	NA	NA	NA	0.114	0.114	0.114	NA	NA	NA	0.316228	NA	NA	NA	NA	0.114	0.114	0.114	NA	NA	NA	0.316228	NA	NA	NA	NA	0.114	0.114	0.114	NA	NA	NA
VNG0049H	-0.0498037	-0.121456	-0.00526216	-0.0342155	0.000570437	Chr	41886	41706	42066	2.372	1.337	3.407	-6	-186	174	0.316228	NA	NA	NA	NA	0.114	0.114	0.114	NA	NA	NA	0.316228	NA	NA	NA	NA	0.114	0.114	0.114	NA	NA	NA	0.316228	NA	NA	NA	NA	0.114	0.114	0.114	NA	NA	NA
VNG0050C	0.245006	0.3861	0.264657	-0.331119	0.000362756	Chr	42916	42896	42936	3.318	1.948	4.688	-209	-229	-189	0.01103	Chr	42796	42796	42796	0.621	0.621	0.621	-89	-89	-89	0.316228	NA	NA	NA	NA	0.114	0.114	0.114	NA	NA	NA	0.316228	NA	NA	NA	NA	0.114	0.114	0.114	NA	NA	NA
VNG0051G	-0.00476958	-0.0767893	0.0325118	-0.0122042	0.00049	Chr	45252	45252	45252	3.804	3.804	3.804	-204	-204	-204	0.316228	NA	NA	NA	NA	0.114	0.114	0.114	NA	NA	NA	0.316228	NA	NA	NA	NA	0.114	0.114	0.114	NA	NA	NA	0.316228	NA	NA	NA	NA	0.114	0.114	0.114	NA	NA	NA
VNG0053H	-0.0852777	-0.176934	-0.120838	-0.224183	0.027	Chr	48812	48812	48812	2.769	2.769	2.769	-44	-44	-44	0.316228	NA	NA	NA	NA	0.114	0.114	0.114	NA	NA	NA	0.316228	NA	NA	NA	NA	0.114	0.114	0.114	NA	NA	NA	0.316228	NA	NA	NA	NA	0.114	0.114	0.114	NA	NA	NA
VNG0057H	0.0391962	-0.0260423	-0.0841585	0.0100818	0.06065	Chr	53352	53352	53352	1.965	1.965	1.965	-160	-160	-160	0.316228	NA	NA	NA	NA	0.114	0.114	0.114	NA	NA	NA	0.05016	Chr	53352	53352	53352	1.78	1.78	1.78	-160	-160	-160	0.01188	Chr	53352	53352	53352	3.651	3.651	3.651	-160	-160	-160
VNG0058H	0.0588389	-0.601566	-0.67521	-0.707244	0.00784	Chr	55687	55687	55687	1.957	1.957	1.957	-58	-58	-58	0.20331	Chr	55802	55802	55802	0.254	0.254	0.254	56	56	56	0.09639	Chr	55651	55651	55651	1.453	1.453	1.453	-94	-94	-94	0.316228	NA	NA	NA	NA	0.114	0.114	0.114	NA	NA	NA
VNG0076H	-0.061747	-0.0958192	-0.0661988	-0.130377	0.00669685	Chr	69400	69372	69452	1.4458	0.556	3.648	-20	-48	32	0.316228	NA	NA	NA	NA	0.114	0.114	0.114	NA	NA	NA	0.2069	Chr	69402	69402	69402	0.945	0.945	0.945	-18	-18	-18	0.04429	Chr	69422	69422	69422	2.63	2.63	2.63	2	2	2
VNG0106G	-0.0124541	-0.0041092	-0.059626	0.0113553	0.0174794	Chr	87713.7	87692	87762	1.05567	0.361	2.39	-45.6667	-94	-24	0.316228	NA	NA	NA	NA	0.114	0.114	0.114	NA	NA	NA	0.41066	Chr	87572	87572	87572	0.367	0.367	0.367	96	96	96	0.256635	Chr	87682	87562	87802	0.78	0.509	1.051	-14	-134	106
VNG0107G	-0.00583732	-0.192735	-0.128016	-0.100782	0.0215734	Chr	89326	89242	89392	1.3124	0.672	2.496	-166	-232	-82	0.316228	NA	NA	NA	NA	0.114	0.114	0.114	NA	NA	NA	0.302718	Chr	89317	89262	89372	0.678	0.521	0.835	-157	-212	-102	0.07562	Chr	89242	89242	89242	2.049	2.049	2.049	-82	-82	-82
VNG0108G	-0.0987449	-0.0169538	-0.00969658	-0.00308904	0.0174794	Chr	87713.7	87692	87762	1.05567	0.361	2.39	-45.6667	-94	-24	0.316228	NA	NA	NA	NA	0.114	0.114	0.114	NA	NA	NA	0.41066	Chr	87572	87572	87572	0.367	0.367	0.367	96	96	96	0.256635	Chr	87682	87562	87802	0.78	0.509	1.051	-14	-134	106
VNG0110C	-0.0358124	-0.435864	-0.621845	-0.326551	0.0174794	Chr	87713.7	87692	87762	1.05567	0.361	2.39	-45.6667	-94	-24	0.316228	NA	NA	NA	NA	0.114	0.114	0.114	NA	NA	NA	0.41066	Chr	87572	87572	87572	0.367	0.367	0.367	96	96	96	0.256635	Chr	87682	87562	87802	0.78	0.509	1.051	-14	-134	106
VNG0116H	-0.0191673	-0.0676471	0.00840206	0.0013622	0.00895675	Chr	101768	101701	101842	1.1052	0.539	2.021	52.2	-14	127	0.316228	NA	NA	NA	NA	0.114	0.114	0.114	NA	NA	NA	0.316228	NA	NA	NA	NA	0.114	0.114	0.114	NA	NA	NA	0.073398	Chr	101607	101472	101742	1.527	1.012	2.042	-109	-244	26
VNG0119H	0.0346616	-0.00418948	-0.0401209	-0.00152118	0.0408806	Chr	103054	102992	103162	0.858667	0.227	1.909	32.6667	-30	141	0.316228	NA	NA	NA	NA	0.114	0.114	0.114	NA	NA	NA	0.316228	NA	NA	NA	NA	0.114	0.114	0.114	NA	NA	NA	0.10155	Chr	103011	103011	103011	1.77	1.77	1.77	-10	-10	-10
VNG0129G	-0.152358	-0.0952923	0.0108517	-0.0196553	0.0114468	Chr	108650	108622	108692	1.0225	0.52	2.17	43.6667	2	72	0.316228	NA	NA	NA	NA	0.114	0.114	0.114	NA	NA	NA	0.45925	Chr	108562	108562	108562	0.267	0.267	0.267	132	132	132	0.16781	Chr	108572	108572	108572	1.123	1.123	1.123	122	122	122
VNG0139H	0.0305989	-0.0589233	-0.0188645	0.0609958	0.000794463	Chr	116422	116412	116432	2.287	1.35	3.224	-188	-198	-178	0.24035	Chr	116372	116372	116372	0.241	0.241	0.241	-138	-138	-138	0.40282	Chr	116372	116372	116372	0.39	0.39	0.39	-138	-138	-138	0.23046	Chr	116372	116372	116372	0.794	0.794	0.794	-138	-138	-138
VNG0180G	-0.045942	-0.0100874	0.0341284	0.0198595	0.282818	Chr	156527	156522	156532	0.9515	0.708	1.195	21	16	26	0.00079	Chr	156522	156522	156522	1.197	1.197	1.197	16	16	16	0.01724	Chr	156522	156522	156522	2.507	2.507	2.507	16	16	16	0.1498	Chr	156532	156532	156532	1.267	1.267	1.267	26	26	26
VNG0181G	-0.00340342	-0.000306131	-0.0483891	-0.0873798	0.282818	Chr	156527	156522	156532	0.9515	0.708	1.195	87	82	92	0.00079	Chr	156522	156522	156522	1.197	1.197	1.197	92	92	92	0.01724	Chr	156522	156522	156522	2.507	2.507	2.507	92	92	92	0.1498	Chr	156532	156532	156532	1.267	1.267	1.267	82	82	82
VNG0192G	-0.0201591	-0.0403792	-0.0344063	-0.0810387	0.0075492	Chr	166487	166462	166512	1.64075	0.529	2.902	207	182	232	0.316228	NA	NA	NA	NA	0.114	0.114	0.114	NA	NA	NA	0.316228	NA	NA	NA	NA	0.114	0.114	0.114	NA	NA	NA	0.07634	Chr	166502	166502	166502	2.017	2.017	2.017	222	222	222
VNG0194H	-0.0203477	-0.0355878	0.0334514	0.0565213	0.000638455	Chr	166514	166462	166582	1.574	0.529	2.902	9.66667	-42	78	0.0922	Chr	166642	166642	166642	0.351	0.351	0.351	138	138	138	0.06348	Chr	166622	166622	166622	1.629	1.629	1.629	118	118	118	0.07634	Chr	166502	166502	166502	2.017	2.017	2.017	-2	-2	-2
VNG0200C	-0.0481088	-0.0314349	0.0507371	0.0639479	0.01984	Chr	171432	171432	171432	0.299	0.299	0.299	8	8	8	0.316228	NA	NA	NA	NA	0.114	0.114	0.114	NA	NA	NA	0.316228	NA	NA	NA	NA	0.114	0.114	0.114	NA	NA	NA	0.316228	NA	NA	NA	NA	0.114	0.114	0.114	NA	NA	NA
VNG0207H	-0.146506	-0.0885827	0.0998482	0.0161111	0.00435331	Chr	175279	175201	175342	1.276	0.877	1.6	-163.6	-226	-86	0.316228	NA	NA	NA	NA	0.114	0.114	0.114	NA	NA	NA	0.316228	NA	NA	NA	NA	0.114	0.114	0.114	NA	NA	NA	0.11883	Chr	175242	175242	175242	1.565	1.565	1.565	-127	-127	-127
VNG0208H	-0.112082	-0.076811	0.0796628	0.0879802	0.00190174	Chr	175390	175222	175702	1.64683	0.808	4.293	82	-230	250	0.316228	NA	NA	NA	NA	0.114	0.114	0.114	NA	NA	NA	0.19044	Chr	175382	175382	175382	0.997	0.997	0.997	90	90	90	0.0741732	Chr	175435	175242	175692	1.294	1.072	1.565	36.3333	-220	229
VNG0209H	0.00259848	-0.0279052	-0.0216245	-0.0450512	0.000187843	Chr	175953	175702	176162	1.74071	0.36	4.293	-39.1429	-248	212	0.316228	NA	NA	NA	NA	0.114	0.114	0.114	NA	NA	NA	0.31975	Chr	176042	176042	176042	0.647	0.647	0.647	-128	-128	-128	0.106709	Chr	175802	175692	175912	1.2775	1.072	1.483	112	2	222
VNG0212H	-0.114066	-0.0740782	0.0195689	0.031485	0.00098	Chr	177612	177612	177612	2.994	2.994	2.994	-24	-24	-24	0.316228	NA	NA	NA	NA	0.114	0.114	0.114	NA	NA	NA	0.316228	NA	NA	NA	NA	0.114	0.114	0.114	NA	NA	NA	0.316228	NA	NA	NA	NA	0.114	0.114	0.114	NA	NA	NA
VNG0215C	0.0291729	-0.0679316	-0.0375788	0.0166517	0.00284492	Chr	183577	183472	183682	2.1435	2.006	2.281	87	-18	192	0.316228	NA	NA	NA	NA	0.114	0.114	0.114	NA	NA	NA	0.316228	NA	NA	NA	NA	0.114	0.114	0.114	NA	NA	NA	0.316228	NA	NA	NA	NA	0.114	0.114	0.114	NA	NA	NA
VNG0216H	-0.178368	-0.0988018	0.140359	0.0222033	8.7e-07	Chr	183862	183682	183992	2.75633	0.762	5.382	4.5	-176	134	0.00079	Chr	183882	183882	183882	1.498	1.498	1.498	24	24	24	0.01411	Chr	183903	183903	183903	2.663	2.663	2.663	45	45	45	0.00036	Chr	183882	183882	183882	11.213	11.213	11.213	24	24	24
VNG0217H	-0.0713559	-0.106032	0.0733169	0.0499589	0.000215702	Chr	184417	184262	184582	2.0135	0.645	4.105	-71	-236	84	0.316228	NA	NA	NA	NA	0.114	0.114	0.114	NA	NA	NA	0.316228	NA	NA	NA	NA	0.114	0.114	0.114	NA	NA	NA	0.316228	NA	NA	NA	NA	0.114	0.114	0.114	NA	NA	NA
VNG0258H	-0.087111	-0.136844	-0.0543	-0.157157	0.0849167	Chr	211017	210932	211102	0.661	0.303	1.641	27	-58	112	0.0197	Chr	210862	210862	210862	0.553	0.553	0.553	-128	-128	-128	0.18574	Chr	210872	210872	210872	1.017	1.017	1.017	-118	-118	-118	0.09039	Chr	210922	210922	210922	1.867	1.867	1.867	-68	-68	-68
VNG0259G	-0.111214	-0.0533862	0.0129592	-0.0121442	0.0849167	Chr	211017	210932	211102	0.661	0.303	1.641	85	0	170	0.0197	Chr	210862	210862	210862	0.553	0.553	0.553	240	240	240	0.18574	Chr	210872	210872	210872	1.017	1.017	1.017	230	230	230	0.09039	Chr	210922	210922	210922	1.867	1.867	1.867	180	180	180
VNG0285C	-0.014212	-0.0482107	-0.0202016	0.0388175	0.0310914	Chr	229212	229142	229272	1.06375	0.626	2.043	-160	-220	-90	0.316228	NA	NA	NA	NA	0.114	0.114	0.114	NA	NA	NA	0.42555	Chr	229231	229231	229231	0.329	0.329	0.329	-179	-179	-179	0.316228	NA	NA	NA	NA	0.114	0.114	0.114	NA	NA	NA
VNG0286C	-0.0363122	0.0399234	0.00988891	-0.0158542	0.0185023	Chr	229342	229212	229690	1.24033	0.354	2.82	102	-247	232	0.316228	NA	NA	NA	NA	0.114	0.114	0.114	NA	NA	NA	0.42555	Chr	229231	229231	229231	0.329	0.329	0.329	212	212	212	0.07706	Chr	229332	229332	229332	1.987	1.987	1.987	112	112	112
VNG0594H	0.694747	0.415775	0.399281	0.953111	0.316228	NA	NA	NA	NA	0.114	0.114	0.114	NA	NA	NA	0.00079	Chr	453972	453972	453972	1.071	1.071	1.071	164	164	164	0.01724	Chr	453952	453952	453952	2.498	2.498	2.498	184	184	184	0.316228	NA	NA	NA	NA	0.114	0.114	0.114	NA	NA	NA
VNG0726C	0.0656731	0.154334	-0.00950566	0.0547895	0.0383755	Chr	547682	547642	547722	0.777	0.382	1.639	104	64	144	0.316228	NA	NA	NA	NA	0.114	0.114	0.114	NA	NA	NA	0.316228	NA	NA	NA	NA	0.114	0.114	0.114	NA	NA	NA	0.22074	Chr	547592	547592	547592	0.835	0.835	0.835	14	14	14
VNG0734G	0.098639	-0.256918	-0.38331	-0.75169	0.0283538	Chr	554577	554502	554612	0.891	0.531	1.517	191	116	226	0.316228	NA	NA	NA	NA	0.114	0.114	0.114	NA	NA	NA	0.40282	Chr	554462	554462	554462	0.388	0.388	0.388	76	76	76	0.13108	Chr	554492	554492	554492	1.421	1.421	1.421	106	106	106
VNG0735G	-0.0188272	-0.0035037	0.0088296	-0.0253825	0.0206137	Chr	554592	554502	554682	0.920571	0.531	1.517	112	22	202	0.316228	NA	NA	NA	NA	0.114	0.114	0.114	NA	NA	NA	0.40282	Chr	554462	554462	554462	0.388	0.388	0.388	242	242	242	0.13108	Chr	554492	554492	554492	1.421	1.421	1.421	212	212	212
VNG0751C	0.0120132	0.015216	-0.0365986	-0.146002	0.0372456	Chr	568999	568872	569052	0.672167	0.196	1.335	23.3333	-30	150	0.09456	Chr	568972	568972	568972	0.348	0.348	0.348	50	50	50	0.15047	Chr	568982	568982	568982	1.161	1.161	1.161	40	40	40	0.14908	Chr	569002	569002	569002	1.269	1.269	1.269	20	20	20
VNG0777G	0.350367	0.53609	0.067012	-0.0532263	0.01347	Chr	584402	584402	584402	0.315	0.315	0.315	-244	-244	-244	0.316228	NA	NA	NA	NA	0.114	0.114	0.114	NA	NA	NA	0.316228	NA	NA	NA	NA	0.114	0.114	0.114	NA	NA	NA	0.316228	NA	NA	NA	NA	0.114	0.114	0.114	NA	NA	NA
VNG0836H	-0.00237638	-0.20659	-0.194018	-0.218859	0.00479773	Chr	635731	635522	635882	0.994333	0.369	2.432	-63.8889	-215	145	0.316228	NA	NA	NA	NA	0.114	0.114	0.114	NA	NA	NA	0.33934	Chr	635762	635762	635762	0.584	0.584	0.584	-95	-95	-95	0.05402	Chr	635702	635702	635702	2.424	2.424	2.424	-35	-35	-35
VNG0837H	-0.151022	-0.0799784	0.149634	0.0234468	0.015683	Chr	636779	636702	636852	1.193	0.842	1.462	130.333	57	207	0.316228	NA	NA	NA	NA	0.114	0.114	0.114	NA	NA	NA	0.37147	Chr	636782	636782	636782	0.488	0.488	0.488	127	127	127	0.316228	NA	NA	NA	NA	0.114	0.114	0.114	NA	NA	NA
VNG0840H	-0.0536943	-0.0994899	-0.191616	-0.192842	0.0236971	Chr	638711	638582	638842	1.09286	0.122	1.98	77.1429	-51	208	0.316228	NA	NA	NA	NA	0.114	0.114	0.114	NA	NA	NA	0.316228	NA	NA	NA	NA	0.114	0.114	0.114	NA	NA	NA	0.12171	Chr	638662	638662	638662	1.522	1.522	1.522	28	28	28
VNG0916G	-0.0393167	0.0760246	0.0102567	0.0201282	0.0153628	Chr	697057	697032	697112	1.04267	0.294	2.301	61	36	116	0.316228	NA	NA	NA	NA	0.114	0.114	0.114	NA	NA	NA	0.34639	Chr	697092	697092	697092	0.559	0.559	0.559	96	96	96	0.06482	Chr	697102	697102	697102	2.218	2.218	2.218	106	106	106
VNG0917G	-0.0512746	-0.07553	0.0440659	-0.0552997	0.0153628	Chr	697057	697032	697112	1.04267	0.294	2.301	61	36	116	0.316228	NA	NA	NA	NA	0.114	0.114	0.114	NA	NA	NA	0.34639	Chr	697092	697092	697092	0.559	0.559	0.559	96	96	96	0.06482	Chr	697102	697102	697102	2.218	2.218	2.218	106	106	106
VNG0919G	-0.0411546	0.466428	0.585277	0.0980996	0.03922	Chr	697892	697892	697892	0.59	0.59	0.59	206	206	206	0.316228	NA	NA	NA	NA	0.114	0.114	0.114	NA	NA	NA	0.46395	Chr	697912	697912	697912	0.26	0.26	0.26	186	186	186	0.316228	NA	NA	NA	NA	0.114	0.114	0.114	NA	NA	NA
VNG0970G	-0.0292352	-0.0449854	-0.0602904	-0.0964653	0.00694183	Chr	743151	743121	743182	1.21933	0.343	2.39	-97	-127	-66	0.316228	NA	NA	NA	NA	0.114	0.114	0.114	NA	NA	NA	0.37304	Chr	743191	743191	743191	0.484	0.484	0.484	-57	-57	-57	0.1336	Chr	743102	743102	743102	1.395	1.395	1.395	-146	-146	-146
VNG0971G	-0.0369397	-0.0394327	-0.0128797	-0.00527911	0.00694183	Chr	743151	743121	743182	1.21933	0.343	2.39	-97	-127	-66	0.316228	NA	NA	NA	NA	0.114	0.114	0.114	NA	NA	NA	0.37304	Chr	743191	743191	743191	0.484	0.484	0.484	-57	-57	-57	0.1336	Chr	743102	743102	743102	1.395	1.395	1.395	-146	-146	-146
VNG0973G	-0.0292063	-0.0637012	-0.00565111	-0.00443537	0.00694183	Chr	743151	743121	743182	1.21933	0.343	2.39	-97	-127	-66	0.316228	NA	NA	NA	NA	0.114	0.114	0.114	NA	NA	NA	0.37304	Chr	743191	743191	743191	0.484	0.484	0.484	-57	-57	-57	0.1336	Chr	743102	743102	743102	1.395	1.395	1.395	-146	-146	-146
VNG0974G	-0.086728	-0.0658605	0.0354513	0.0243381	0.00694183	Chr	743151	743121	743182	1.21933	0.343	2.39	-97	-127	-66	0.316228	NA	NA	NA	NA	0.114	0.114	0.114	NA	NA	NA	0.37304	Chr	743191	743191	743191	0.484	0.484	0.484	-57	-57	-57	0.1336	Chr	743102	743102	743102	1.395	1.395	1.395	-146	-146	-146
VNG0976G	-0.0844986	-0.140424	-0.0600844	0.0369964	0.00694183	Chr	743151	743121	743182	1.21933	0.343	2.39	-97	-127	-66	0.316228	NA	NA	NA	NA	0.114	0.114	0.114	NA	NA	NA	0.37304	Chr	743191	743191	743191	0.484	0.484	0.484	-57	-57	-57	0.1336	Chr	743102	743102	743102	1.395	1.395	1.395	-146	-146	-146
VNG0985H	-0.102237	-0.0777733	0.037544	0.00540481	0.0100466	Chr	749362	749362	749362	1.4425	1.019	1.866	30	30	30	0.316228	NA	NA	NA	NA	0.114	0.114	0.114	NA	NA	NA	0.316228	NA	NA	NA	NA	0.114	0.114	0.114	NA	NA	NA	0.316228	NA	NA	NA	NA	0.114	0.114	0.114	NA	NA	NA
VNG0987H	-0.0181506	-0.0682118	0.0164224	-0.00217055	0.00049	Chr	753242	753242	753242	3.181	3.181	3.181	-110	-110	-110	0.316228	NA	NA	NA	NA	0.114	0.114	0.114	NA	NA	NA	0.316228	NA	NA	NA	NA	0.114	0.114	0.114	NA	NA	NA	0.316228	NA	NA	NA	NA	0.114	0.114	0.114	NA	NA	NA
VNG0988H	-0.0358274	-0.231448	-0.187267	-0.299182	0.00049	Chr	754167	754167	754167	5.324	5.324	5.324	-18	-18	-18	0.316228	NA	NA	NA	NA	0.114	0.114	0.114	NA	NA	NA	0.316228	NA	NA	NA	NA	0.114	0.114	0.114	NA	NA	NA	0.316228	NA	NA	NA	NA	0.114	0.114	0.114	NA	NA	NA
VNG0991H	0.018395	-0.0653878	-0.0495457	-0.0829483	0.02663	Chr	757251	757251	757251	2.789	2.789	2.789	235	235	235	0.316228	NA	NA	NA	NA	0.114	0.114	0.114	NA	NA	NA	0.316228	NA	NA	NA	NA	0.114	0.114	0.114	NA	NA	NA	0.125937	Chr	757117	757082	757152	1.1475	1.067	1.228	101	66	136
VNG0995H	0.0112785	0.00847638	0.0268016	-0.0304178	0.0127947	Chr	760152	760122	760181	1.07	0.735	1.516	213.667	184	244	0.316228	NA	NA	NA	NA	0.114	0.114	0.114	NA	NA	NA	0.316228	NA	NA	NA	NA	0.114	0.114	0.114	NA	NA	NA	0.316228	NA	NA	NA	NA	0.114	0.114	0.114	NA	NA	NA
VNG1001G	-0.10796	-0.0649568	0.029709	0.0398133	0.0131889	Chr	768673	768572	768752	0.9665	0.154	1.598	135.125	34	214	0.316228	NA	NA	NA	NA	0.114	0.114	0.114	NA	NA	NA	0.41066	Chr	768602	768602	768602	0.363	0.363	0.363	64	64	64	0.15448	Chr	768592	768592	768592	1.238	1.238	1.238	54	54	54
VNG1006H	0.0541013	-0.192282	-0.0602913	-0.146558	0.0174505	Chr	770746	770652	770872	1.26717	0.283	2.279	81.8333	-44	176	0.316228	NA	NA	NA	NA	0.114	0.114	0.114	NA	NA	NA	0.32915	Chr	770792	770792	770792	0.621	0.621	0.621	36	36	36	0.1977	Chr	770792	770792	770792	0.951	0.951	0.951	36	36	36
VNG1008G	-0.0724009	-0.091382	0.0116389	0.0633222	0.02304	Chr	773212	773212	773212	0.872	0.872	0.872	148	148	148	0.316228	NA	NA	NA	NA	0.114	0.114	0.114	NA	NA	NA	0.316228	NA	NA	NA	NA	0.114	0.114	0.114	NA	NA	NA	0.316228	NA	NA	NA	NA	0.114	0.114	0.114	NA	NA	NA
VNG1020C	-0.0990662	-0.0902765	0.230353	0.0725442	0.00638	Chr	781962	781962	781962	0.375	0.375	0.375	84	84	84	0.30181	Chr	782052	782052	782052	0.221	0.221	0.221	-7	-7	-7	0.316228	NA	NA	NA	NA	0.114	0.114	0.114	NA	NA	NA	0.316228	NA	NA	NA	NA	0.114	0.114	0.114	NA	NA	NA
VNG1059C	-0.151401	0.129659	-0.137626	-0.211813	0.00481186	Chr	807712	807561	807802	1.509	0.83	2.831	16	-134	106	0.10875	Chr	807752	807752	807752	0.327	0.327	0.327	56	56	56	0.26411	Chr	807532	807532	807532	0.763	0.763	0.763	-164	-164	-164	0.316228	NA	NA	NA	NA	0.114	0.114	0.114	NA	NA	NA
VNG1060H	-0.115286	-0.0754268	-0.00797052	0.0289514	0.00266653	Chr	807787	807772	807802	1.8485	0.866	2.831	139	124	154	0.10875	Chr	807752	807752	807752	0.327	0.327	0.327	174	174	174	0.31897	Chr	807991	807991	807991	0.649	0.649	0.649	-66	-66	-66	0.316228	NA	NA	NA	NA	0.114	0.114	0.114	NA	NA	NA
VNG1063H	-0.0345546	-0.0134419	0.051606	0.0885403	0.025	Chr	811002	811002	811002	0.829	0.829	0.829	240	240	240	0.316228	NA	NA	NA	NA	0.114	0.114	0.114	NA	NA	NA	0.316228	NA	NA	NA	NA	0.114	0.114	0.114	NA	NA	NA	0.316228	NA	NA	NA	NA	0.114	0.114	0.114	NA	NA	NA
VNG1064H	-0.05895	-0.00966522	0.022691	0.0162915	0.0348	Chr	812681	812681	812681	0.645	0.645	0.645	189	189	189	0.316228	NA	NA	NA	NA	0.114	0.114	0.114	NA	NA	NA	0.316228	NA	NA	NA	NA	0.114	0.114	0.114	NA	NA	NA	0.316228	NA	NA	NA	NA	0.114	0.114	0.114	NA	NA	NA
VNG1065C	-0.19476	-0.0358177	0.145197	0.0818961	0.0348	Chr	812681	812681	812681	0.645	0.645	0.645	-60	-60	-60	0.316228	NA	NA	NA	NA	0.114	0.114	0.114	NA	NA	NA	0.316228	NA	NA	NA	NA	0.114	0.114	0.114	NA	NA	NA	0.316228	NA	NA	NA	NA	0.114	0.114	0.114	NA	NA	NA
VNG1066C	-0.0248644	-0.158479	-0.127332	-0.117657	0.0121077	Chr	813382	813342	813422	1.43	1.366	1.494	-10	-50	30	0.42396	Chr	813592	813592	813592	0.189	0.189	0.189	-220	-220	-220	0.316228	NA	NA	NA	NA	0.114	0.114	0.114	NA	NA	NA	0.316228	NA	NA	NA	NA	0.114	0.114	0.114	NA	NA	NA
VNG1088C	-0.0420325	-0.0597656	-0.17597	-0.158364	0.0072959	Chr	834332	834262	834391	1.01263	0.281	2.377	153.875	84	213	0.4736	Chr	834411	834411	834411	0.178	0.178	0.178	233	233	233	0.41144	Chr	834402	834402	834402	0.36	0.36	0.36	224	224	224	0.10731	Chr	834182	834182	834182	1.712	1.712	1.712	4	4	4
VNG1089G	-0.0340168	0.0341437	0.0540204	0.141685	0.0072959	Chr	834332	834262	834391	1.01263	0.281	2.377	150	90	220	0.4736	Chr	834411	834411	834411	0.178	0.178	0.178	70	70	70	0.41144	Chr	834402	834402	834402	0.36	0.36	0.36	80	80	80	0.316228	NA	NA	NA	NA	0.114	0.114	0.114	NA	NA	NA
VNG1090H	-0.00496178	0.622523	0.359567	0.783612	0.0072959	Chr	834332	834262	834391	1.01263	0.281	2.377	150	90	220	0.4736	Chr	834411	834411	834411	0.178	0.178	0.178	70	70	70	0.41144	Chr	834402	834402	834402	0.36	0.36	0.36	80	80	80	0.316228	NA	NA	NA	NA	0.114	0.114	0.114	NA	NA	NA
VNG1132G	-0.0136757	-0.042646	0.0184577	0.0246594	0.0305892	Chr	860276	860192	860372	0.789	0.213	1.61	-0.285714	-96	84	0.316228	NA	NA	NA	NA	0.114	0.114	0.114	NA	NA	NA	0.316228	NA	NA	NA	NA	0.114	0.114	0.114	NA	NA	NA	0.34066	Chr	860172	860172	860172	0.577	0.577	0.577	104	104	104
VNG1137G	-0.0795016	-0.0769847	0.0412596	0.0692759	0.0386624	Chr	862693	862601	862922	0.745429	0.218	1.542	0.714286	-228	93	0.316228	NA	NA	NA	NA	0.114	0.114	0.114	NA	NA	NA	0.316228	NA	NA	NA	NA	0.114	0.114	0.114	NA	NA	NA	0.19878	Chr	862652	862652	862652	0.943	0.943	0.943	42	42	42
VNG1214H	-0.0655917	-0.328843	-0.170002	-0.0765443	0.0227293	Chr	915127	915072	915191	1.48975	0.566	2.686	-147	-212	-92	0.316228	NA	NA	NA	NA	0.114	0.114	0.114	NA	NA	NA	0.37539	Chr	915172	915172	915172	0.473	0.473	0.473	-192	-192	-192	0.11883	Chr	915052	915052	915052	1.563	1.563	1.563	-72	-72	-72
VNG1262G	0.434919	-0.330484	-0.349455	1.11757	0.0445704	Chr	950636	950582	950682	0.7508	0.301	1.21	160	106	206	0.316228	NA	NA	NA	NA	0.114	0.114	0.114	NA	NA	NA	0.316228	NA	NA	NA	NA	0.114	0.114	0.114	NA	NA	NA	0.23118	Chr	950372	950372	950372	0.791	0.791	0.791	-104	-104	-104
VNG1263C	-0.018819	0.0482312	-0.0332931	0.0564465	0.0445704	Chr	950636	950582	950682	0.7508	0.301	1.21	-18	-64	36	0.316228	NA	NA	NA	NA	0.114	0.114	0.114	NA	NA	NA	0.316228	NA	NA	NA	NA	0.114	0.114	0.114	NA	NA	NA	0.242943	Chr	950597	950372	950822	0.7275	0.664	0.791	21	-204	246
VNG1270H	-0.124624	-0.111389	0.0445072	0.0254346	0.000296834	Chr	954450	954392	954502	1.695	0.857	2.665	134.5	76	186	0.00158	Chr	954462	954462	954462	0.747	0.747	0.747	146	146	146	0.04545	Chr	954482	954482	954482	1.85	1.85	1.85	166	166	166	0.03349	Chr	954491	954491	954491	2.921	2.921	2.921	176	176	176
VNG1271H	-0.028923	-0.0478815	0.0165454	-0.214912	0.0178249	Chr	954798	954502	954962	1.05333	0.211	1.906	-52.3333	-216	244	0.316228	NA	NA	NA	NA	0.114	0.114	0.114	NA	NA	NA	0.316228	NA	NA	NA	NA	0.114	0.114	0.114	NA	NA	NA	0.12532	Chr	954992	954992	954992	1.492	1.492	1.492	-246	-246	-246
VNG1467G	-0.0959224	-0.0762849	0.105833	0.0714918	0.0120998	Chr	1.08917e+06	1089006	1089318	0.7489	0.238	1.769	-45.5	-196	116	0.316228	NA	NA	NA	NA	0.114	0.114	0.114	NA	NA	NA	0.36677	Chr	1089108	1089108	1089108	0.506	0.506	0.506	14	14	14	0.324731	Chr	1089110	1088988	1089232	0.6655	0.432	0.899	12	-110	134
VNG1475C	-0.0644155	-0.00367608	0.0722845	0.0363963	0.025778	Chr	1096338	1096178	1096408	0.917833	0.426	2.117	-52	-122	108	0.316228	NA	NA	NA	NA	0.114	0.114	0.114	NA	NA	NA	0.35737	Chr	1096378	1096378	1096378	0.533	0.533	0.533	-92	-92	-92	0.19121	Chr	1096448	1096448	1096448	0.976	0.976	0.976	-162	-162	-162
VNG1476C	-0.0257761	0.0531509	-0.0334524	0.0469437	0.025778	Chr	1096338	1096178	1096408	0.917833	0.426	2.117	-52	-122	108	0.316228	NA	NA	NA	NA	0.114	0.114	0.114	NA	NA	NA	0.35737	Chr	1096378	1096378	1096378	0.533	0.533	0.533	-92	-92	-92	0.19121	Chr	1096448	1096448	1096448	0.976	0.976	0.976	-162	-162	-162
VNG1534H	0.0293562	0.132541	0.0412888	0.0266441	0.0132966	Chr	1143623	1143588	1143713	1.0068	0.506	1.723	-103	-138	-13	0.316228	NA	NA	NA	NA	0.114	0.114	0.114	NA	NA	NA	0.17398	Chr	1143698	1143698	1143698	1.049	1.049	1.049	-28	-28	-28	0.10263	Chr	1143648	1143648	1143648	1.759	1.759	1.759	-78	-78	-78
VNG1585C	-0.0563759	0.0248628	0.0221577	0.0345806	0.00098	Chr	1184548	1184548	1184548	2.949	2.949	2.949	142	142	142	0.316228	NA	NA	NA	NA	0.114	0.114	0.114	NA	NA	NA	0.316228	NA	NA	NA	NA	0.114	0.114	0.114	NA	NA	NA	0.316228	NA	NA	NA	NA	0.114	0.114	0.114	NA	NA	NA
VNG1589C	0.209303	-0.751247	-0.85003	0.158677	0.0246599	Chr	1.18855e+06	1188358	1188758	0.889	0.19	1.584	-30.8	-234	166	0.316228	NA	NA	NA	NA	0.114	0.114	0.114	NA	NA	NA	0.316228	NA	NA	NA	NA	0.114	0.114	0.114	NA	NA	NA	0.13288	Chr	1188368	1188368	1188368	1.399	1.399	1.399	156	156	156
VNG1646G	0.0409026	-0.075214	-0.305033	-0.0551266	0.316228	NA	NA	NA	NA	0.114	0.114	0.114	NA	NA	NA	0.00315	Chr	1228918	1228918	1228918	0.728	0.728	0.728	244	244	244	0.316228	NA	NA	NA	NA	0.114	0.114	0.114	NA	NA	NA	0.316228	NA	NA	NA	NA	0.114	0.114	0.114	NA	NA	NA
VNG1647G	0.0467915	0.100015	-0.0293253	-0.00690178	0.316228	NA	NA	NA	NA	0.114	0.114	0.114	NA	NA	NA	0.00315	Chr	1228918	1228918	1228918	0.728	0.728	0.728	244	244	244	0.316228	NA	NA	NA	NA	0.114	0.114	0.114	NA	NA	NA	0.316228	NA	NA	NA	NA	0.114	0.114	0.114	NA	NA	NA
VNG1648G	-0.00141668	0.00120101	-0.0418404	-0.0342777	0.316228	NA	NA	NA	NA	0.114	0.114	0.114	NA	NA	NA	0.00315	Chr	1228918	1228918	1228918	0.728	0.728	0.728	244	244	244	0.316228	NA	NA	NA	NA	0.114	0.114	0.114	NA	NA	NA	0.316228	NA	NA	NA	NA	0.114	0.114	0.114	NA	NA	NA
VNG1649G	-0.0380239	-0.00290904	-0.019518	-0.0792721	0.316228	NA	NA	NA	NA	0.114	0.114	0.114	NA	NA	NA	0.00315	Chr	1228918	1228918	1228918	0.728	0.728	0.728	244	244	244	0.316228	NA	NA	NA	NA	0.114	0.114	0.114	NA	NA	NA	0.316228	NA	NA	NA	NA	0.114	0.114	0.114	NA	NA	NA
VNG1650H	-0.0187618	-0.0358323	-0.00400518	-0.0516742	2.1e-05	Chr	1230428	1230118	1230588	3.312	2	4.389	88	-222	248	0.316228	NA	NA	NA	NA	0.114	0.114	0.114	NA	NA	NA	0.01724	Chr	1230588	1230588	1230588	2.48	2.48	2.48	248	248	248	0.01584	Chr	1230588	1230588	1230588	3.463	3.463	3.463	248	248	248
VNG1654G	-0.0689081	-0.0869555	0.041023	0.00899369	2.26e-05	Chr	1.23378e+06	1233604	1234064	2.14014	0.557	5.282	-46.1429	-219	241	0.13081	Chr	1233954	1233954	1233954	0.294	0.294	0.294	131	131	131	0.316228	NA	NA	NA	NA	0.114	0.114	0.114	NA	NA	NA	0.07562	Chr	1234034	1234034	1234034	2.044	2.044	2.044	211	211	211
VNG1687C	-0.0422944	-0.0717052	0.0255593	-0.0545264	0.000805248	Chr	1257918	1257858	1257978	1.53583	0.583	3.346	164	104	224	0.39086	Chr	1257758	1257758	1257758	0.197	0.197	0.197	4	4	4	0.33542	Chr	1257808	1257808	1257808	0.604	0.604	0.604	54	54	54	0.13072	Chr	1257828	1257828	1257828	1.423	1.423	1.423	74	74	74
VNG1688C	-0.102857	-0.0948043	0.0391804	0.0384518	0.031137	Chr	1257948	1257928	1257978	0.850667	0.583	1.347	228	198	248	0.316228	NA	NA	NA	NA	0.114	0.114	0.114	NA	NA	NA	0.316228	NA	NA	NA	NA	0.114	0.114	0.114	NA	NA	NA	0.316228	NA	NA	NA	NA	0.114	0.114	0.114	NA	NA	NA
VNG1689G	-0.0442538	-0.0665326	-0.00352112	-0.041966	0.031137	Chr	1257948	1257928	1257978	0.850667	0.583	1.347	228	198	248	0.316228	NA	NA	NA	NA	0.114	0.114	0.114	NA	NA	NA	0.316228	NA	NA	NA	NA	0.114	0.114	0.114	NA	NA	NA	0.316228	NA	NA	NA	NA	0.114	0.114	0.114	NA	NA	NA
VNG1690G	0.00622292	-0.0109315	-0.00557018	-0.0509299	0.031137	Chr	1257948	1257928	1257978	0.850667	0.583	1.347	228	198	248	0.316228	NA	NA	NA	NA	0.114	0.114	0.114	NA	NA	NA	0.316228	NA	NA	NA	NA	0.114	0.114	0.114	NA	NA	NA	0.316228	NA	NA	NA	NA	0.114	0.114	0.114	NA	NA	NA
VNG1691G	0.0045495	-0.072263	-0.0216313	-0.0100462	0.031137	Chr	1257948	1257928	1257978	0.850667	0.583	1.347	228	198	248	0.316228	NA	NA	NA	NA	0.114	0.114	0.114	NA	NA	NA	0.316228	NA	NA	NA	NA	0.114	0.114	0.114	NA	NA	NA	0.316228	NA	NA	NA	NA	0.114	0.114	0.114	NA	NA	NA
VNG1692G	-0.0423508	-0.0663169	0.00607319	0.0628143	0.031137	Chr	1257948	1257928	1257978	0.850667	0.583	1.347	228	198	248	0.316228	NA	NA	NA	NA	0.114	0.114	0.114	NA	NA	NA	0.316228	NA	NA	NA	NA	0.114	0.114	0.114	NA	NA	NA	0.316228	NA	NA	NA	NA	0.114	0.114	0.114	NA	NA	NA
VNG1693G	0.015677	0.0340557	0.0977108	-0.0570424	0.031137	Chr	1257948	1257928	1257978	0.850667	0.583	1.347	228	198	248	0.316228	NA	NA	NA	NA	0.114	0.114	0.114	NA	NA	NA	0.316228	NA	NA	NA	NA	0.114	0.114	0.114	NA	NA	NA	0.316228	NA	NA	NA	NA	0.114	0.114	0.114	NA	NA	NA
VNG1695G	-0.0559854	-0.0239382	-0.0288545	-0.0941506	0.031137	Chr	1257948	1257928	1257978	0.850667	0.583	1.347	228	198	248	0.316228	NA	NA	NA	NA	0.114	0.114	0.114	NA	NA	NA	0.316228	NA	NA	NA	NA	0.114	0.114	0.114	NA	NA	NA	0.316228	NA	NA	NA	NA	0.114	0.114	0.114	NA	NA	NA
VNG1697G	-0.0055818	-0.0303031	-0.0481456	-0.00456044	0.031137	Chr	1257948	1257928	1257978	0.850667	0.583	1.347	228	198	248	0.316228	NA	NA	NA	NA	0.114	0.114	0.114	NA	NA	NA	0.316228	NA	NA	NA	NA	0.114	0.114	0.114	NA	NA	NA	0.316228	NA	NA	NA	NA	0.114	0.114	0.114	NA	NA	NA
VNG1698G	-0.0387956	-0.088219	0.00417394	-0.0303743	0.031137	Chr	1257948	1257928	1257978	0.850667	0.583	1.347	228	198	248	0.316228	NA	NA	NA	NA	0.114	0.114	0.114	NA	NA	NA	0.316228	NA	NA	NA	NA	0.114	0.114	0.114	NA	NA	NA	0.316228	NA	NA	NA	NA	0.114	0.114	0.114	NA	NA	NA
VNG1699C	-0.0108685	-0.0518405	-0.0300145	0.0152508	0.031137	Chr	1257948	1257928	1257978	0.850667	0.583	1.347	228	198	248	0.316228	NA	NA	NA	NA	0.114	0.114	0.114	NA	NA	NA	0.316228	NA	NA	NA	NA	0.114	0.114	0.114	NA	NA	NA	0.316228	NA	NA	NA	NA	0.114	0.114	0.114	NA	NA	NA
VNG1700G	-0.0663537	-0.0392258	0.0511767	-0.00875164	0.031137	Chr	1257948	1257928	1257978	0.850667	0.583	1.347	228	198	248	0.316228	NA	NA	NA	NA	0.114	0.114	0.114	NA	NA	NA	0.316228	NA	NA	NA	NA	0.114	0.114	0.114	NA	NA	NA	0.316228	NA	NA	NA	NA	0.114	0.114	0.114	NA	NA	NA
VNG1701G	-0.0190403	-0.0965782	0.0406087	-0.0122796	0.031137	Chr	1257948	1257928	1257978	0.850667	0.583	1.347	228	198	248	0.316228	NA	NA	NA	NA	0.114	0.114	0.114	NA	NA	NA	0.316228	NA	NA	NA	NA	0.114	0.114	0.114	NA	NA	NA	0.316228	NA	NA	NA	NA	0.114	0.114	0.114	NA	NA	NA
VNG1702G	-0.0590917	-0.0730061	-0.0165006	-0.0531863	0.031137	Chr	1257948	1257928	1257978	0.850667	0.583	1.347	228	198	248	0.316228	NA	NA	NA	NA	0.114	0.114	0.114	NA	NA	NA	0.316228	NA	NA	NA	NA	0.114	0.114	0.114	NA	NA	NA	0.316228	NA	NA	NA	NA	0.114	0.114	0.114	NA	NA	NA
VNG1703G	-0.00886993	-0.00870842	0.0201872	0.0458525	0.031137	Chr	1257948	1257928	1257978	0.850667	0.583	1.347	228	198	248	0.316228	NA	NA	NA	NA	0.114	0.114	0.114	NA	NA	NA	0.316228	NA	NA	NA	NA	0.114	0.114	0.114	NA	NA	NA	0.316228	NA	NA	NA	NA	0.114	0.114	0.114	NA	NA	NA
VNG1705G	-0.00535135	0.0118617	-0.00396303	0.0093043	0.031137	Chr	1257948	1257928	1257978	0.850667	0.583	1.347	228	198	248	0.316228	NA	NA	NA	NA	0.114	0.114	0.114	NA	NA	NA	0.316228	NA	NA	NA	NA	0.114	0.114	0.114	NA	NA	NA	0.316228	NA	NA	NA	NA	0.114	0.114	0.114	NA	NA	NA
VNG1706G	-0.0236636	-0.0479001	-0.0197418	-0.0364077	0.031137	Chr	1257948	1257928	1257978	0.850667	0.583	1.347	228	198	248	0.316228	NA	NA	NA	NA	0.114	0.114	0.114	NA	NA	NA	0.316228	NA	NA	NA	NA	0.114	0.114	0.114	NA	NA	NA	0.316228	NA	NA	NA	NA	0.114	0.114	0.114	NA	NA	NA
VNG1707G	-0.0408152	-0.124442	-0.0131305	0.00883979	0.031137	Chr	1257948	1257928	1257978	0.850667	0.583	1.347	228	198	248	0.316228	NA	NA	NA	NA	0.114	0.114	0.114	NA	NA	NA	0.316228	NA	NA	NA	NA	0.114	0.114	0.114	NA	NA	NA	0.316228	NA	NA	NA	NA	0.114	0.114	0.114	NA	NA	NA
VNG1709G	0.0387831	0.0110298	-0.0323071	-0.000708059	0.031137	Chr	1257948	1257928	1257978	0.850667	0.583	1.347	228	198	248	0.316228	NA	NA	NA	NA	0.114	0.114	0.114	NA	NA	NA	0.316228	NA	NA	NA	NA	0.114	0.114	0.114	NA	NA	NA	0.316228	NA	NA	NA	NA	0.114	0.114	0.114	NA	NA	NA
VNG1711G	-0.0578604	-0.0737396	-0.0129807	-0.00971228	0.031137	Chr	1257948	1257928	1257978	0.850667	0.583	1.347	228	198	248	0.316228	NA	NA	NA	NA	0.114	0.114	0.114	NA	NA	NA	0.316228	NA	NA	NA	NA	0.114	0.114	0.114	NA	NA	NA	0.316228	NA	NA	NA	NA	0.114	0.114	0.114	NA	NA	NA
VNG1713G	-0.0448676	-0.0378738	-0.00867337	-0.0362582	0.031137	Chr	1257948	1257928	1257978	0.850667	0.583	1.347	228	198	248	0.316228	NA	NA	NA	NA	0.114	0.114	0.114	NA	NA	NA	0.316228	NA	NA	NA	NA	0.114	0.114	0.114	NA	NA	NA	0.316228	NA	NA	NA	NA	0.114	0.114	0.114	NA	NA	NA
VNG1714G	-0.0605974	0.0387701	0.00263556	0.0103409	0.031137	Chr	1257948	1257928	1257978	0.850667	0.583	1.347	228	198	248	0.316228	NA	NA	NA	NA	0.114	0.114	0.114	NA	NA	NA	0.316228	NA	NA	NA	NA	0.114	0.114	0.114	NA	NA	NA	0.316228	NA	NA	NA	NA	0.114	0.114	0.114	NA	NA	NA
VNG1715G	-0.0414418	0.0232886	-0.017594	0.0358638	0.031137	Chr	1257948	1257928	1257978	0.850667	0.583	1.347	228	198	248	0.316228	NA	NA	NA	NA	0.114	0.114	0.114	NA	NA	NA	0.316228	NA	NA	NA	NA	0.114	0.114	0.114	NA	NA	NA	0.316228	NA	NA	NA	NA	0.114	0.114	0.114	NA	NA	NA
VNG1716G	-0.104054	-0.0547747	-0.121469	-0.0875099	0.031137	Chr	1257948	1257928	1257978	0.850667	0.583	1.347	228	198	248	0.316228	NA	NA	NA	NA	0.114	0.114	0.114	NA	NA	NA	0.316228	NA	NA	NA	NA	0.114	0.114	0.114	NA	NA	NA	0.316228	NA	NA	NA	NA	0.114	0.114	0.114	NA	NA	NA
VNG1718G	-0.103818	-0.0233502	0.0032496	0.00551812	0.031137	Chr	1257948	1257928	1257978	0.850667	0.583	1.347	228	198	248	0.316228	NA	NA	NA	NA	0.114	0.114	0.114	NA	NA	NA	0.316228	NA	NA	NA	NA	0.114	0.114	0.114	NA	NA	NA	0.316228	NA	NA	NA	NA	0.114	0.114	0.114	NA	NA	NA
VNG1719G	-0.0352586	-0.0342209	0.0382511	0.0107682	0.031137	Chr	1257948	1257928	1257978	0.850667	0.583	1.347	228	198	248	0.316228	NA	NA	NA	NA	0.114	0.114	0.114	NA	NA	NA	0.316228	NA	NA	NA	NA	0.114	0.114	0.114	NA	NA	NA	0.316228	NA	NA	NA	NA	0.114	0.114	0.114	NA	NA	NA
VNG1732C	0.169965	0.0202604	-0.00348716	-0.108943	0.00731214	Chr	1.28156e+06	1281438	1281718	0.956111	0.242	2.119	27.4444	-98	182	0.316228	NA	NA	NA	NA	0.114	0.114	0.114	NA	NA	NA	0.37382	Chr	1281599	1281599	1281599	0.479	0.479	0.479	62	62	62	0.11199	Chr	1281483	1281483	1281483	1.653	1.653	1.653	-54	-54	-54
VNG1734H	-0.0473153	-0.0639857	-0.0067829	-0.0938517	6.47e-05	Chr	1283733	1283678	1283768	1.33217	0.289	3.451	49	-6	84	0.00079	Chr	1283808	1283808	1283808	1.579	1.579	1.579	124	124	124	0.00549	Chr	1283798	1283798	1283798	3.674	3.674	3.674	113	113	113	0.01476	Chr	1283768	1283768	1283768	3.54	3.54	3.54	84	84	84
VNG1735C	-0.000200364	-0.0452939	0.0100448	-0.102968	6.47e-05	Chr	1283733	1283678	1283768	1.33217	0.289	3.451	103	68	158	0.00079	Chr	1283808	1283808	1283808	1.579	1.579	1.579	28	28	28	0.00549	Chr	1283798	1283798	1283798	3.674	3.674	3.674	39	39	39	0.01476	Chr	1283768	1283768	1283768	3.54	3.54	3.54	68	68	68
VNG1758H	-0.0410015	-0.0365024	0.0352264	0.0565683	0.170789	Chr	1.29698e+06	1296936	1297036	0.51	0.177	1.692	18.5714	-40	60	0.00552	Chr	1296956	1296956	1296956	0.693	0.693	0.693	40	40	40	0.16301	Chr	1296966	1296966	1296966	1.095	1.095	1.095	30	30	30	0.13612	Chr	1296996	1296996	1296996	1.372	1.372	1.372	0	0	0
VNG1831H	0.00233672	-0.00644065	0.0653553	0.0290524	0.0346361	Chr	1352474	1352398	1352538	0.8572	0.292	2.034	60	-16	124	0.316228	NA	NA	NA	NA	0.114	0.114	0.114	NA	NA	NA	0.316228	NA	NA	NA	NA	0.114	0.114	0.114	NA	NA	NA	0.11919	Chr	1352478	1352478	1352478	1.555	1.555	1.555	64	64	64
VNG1835G	0.0181076	-0.0589333	-0.0386212	-0.132536	0.00288414	Chr	1356292	1356278	1356298	1.4658	0.523	2.462	228	214	234	0.316228	NA	NA	NA	NA	0.114	0.114	0.114	NA	NA	NA	0.316228	NA	NA	NA	NA	0.114	0.114	0.114	NA	NA	NA	0.17861	Chr	1356308	1356308	1356308	1.052	1.052	1.052	244	244	244
VNG1836G	-0.0922459	-0.0804927	0.01712	0.0127156	0.00259396	Chr	1.3563e+06	1356278	1356318	1.32	0.523	2.462	-54.3333	-76	-36	0.316228	NA	NA	NA	NA	0.114	0.114	0.114	NA	NA	NA	0.316228	NA	NA	NA	NA	0.114	0.114	0.114	NA	NA	NA	0.17861	Chr	1356308	1356308	1356308	1.052	1.052	1.052	-66	-66	-66
VNG1890H	0.0732164	-0.191563	-0.165174	-0.0929809	0.0261218	Chr	1397644	1397573	1397701	1.18867	0.515	2.411	-176	-247	-119	0.11742	Chr	1397733	1397733	1397733	0.315	0.315	0.315	-87	-87	-87	0.13558	Chr	1397693	1397693	1397693	1.252	1.252	1.252	-127	-127	-127	0.04213	Chr	1397672	1397672	1397672	2.699	2.699	2.699	-148	-148	-148
VNG1891H	-0.0730252	-0.0373606	0.0227676	-0.0115191	0.00277137	Chr	1.39857e+06	1398508	1398658	1.01256	0.211	3.586	135.333	52	202	0.02128	Chr	1398528	1398528	1398528	0.534	0.534	0.534	182	182	182	0.234477	Chr	1398603	1398548	1398658	0.759	0.356	1.162	107	52	162	0.11667	Chr	1398528	1398528	1398528	1.592	1.592	1.592	182	182	182
VNG1973H	-0.0460627	-0.0672274	0.0656218	0.053343	0.00414887	Chr	1.45783e+06	1457738	1457878	1.12387	0.385	2.202	-137.375	-228	-88	0.07092	Chr	1457919	1457919	1457919	0.393	0.393	0.393	-48	-48	-48	0.16771	Chr	1457878	1457878	1457878	1.071	1.071	1.071	-88	-88	-88	0.04465	Chr	1457858	1457858	1457858	2.607	2.607	2.607	-109	-109	-109
VNG1974H	-0.00730722	-0.0385875	0.0086353	0.0141988	0.0030154	Chr	1.45786e+06	1457838	1457878	1.2175	0.385	2.202	182.833	160	200	0.07092	Chr	1457919	1457919	1457919	0.393	0.393	0.393	120	120	120	0.16771	Chr	1457878	1457878	1457878	1.071	1.071	1.071	160	160	160	0.04465	Chr	1457858	1457858	1457858	2.607	2.607	2.607	181	181	181
VNG1976H	-0.0258085	-0.184269	-0.0280398	-0.124713	0.02225	Chr	1458938	1458938	1458938	3.081	3.081	3.081	-222	-222	-222	0.316228	NA	NA	NA	NA	0.114	0.114	0.114	NA	NA	NA	0.316228	NA	NA	NA	NA	0.114	0.114	0.114	NA	NA	NA	0.316228	NA	NA	NA	NA	0.114	0.114	0.114	NA	NA	NA
VNG1977H	-0.0424123	-0.0753067	0.0195282	0.0356589	0.000322409	Chr	1.45901e+06	1458938	1459168	1.746	0.794	3.081	23.6667	-138	92	0.10087	Chr	1459258	1459258	1459258	0.342	0.342	0.342	-228	-228	-228	0.01489	Chr	1459268	1459268	1459268	2.626	2.626	2.626	-238	-238	-238	0.0323911	Chr	1459208	1459168	1459248	2.086	1.44	2.732	-178	-218	-138
VNG1978H	-0.000379535	0.0904632	0.00626136	0.0585356	0.00012878	Chr	1.46002e+06	1459788	1460188	1.728	0.209	3.722	-67.3333	-234	166	0.316228	NA	NA	NA	NA	0.114	0.114	0.114	NA	NA	NA	0.316228	NA	NA	NA	NA	0.114	0.114	0.114	NA	NA	NA	0.316228	NA	NA	NA	NA	0.114	0.114	0.114	NA	NA	NA
VNG2093G	0.0867628	0.334026	0.199646	0.726216	0.0231017	Chr	1538195	1538128	1538249	0.852333	0.504	1.732	80.6667	14	134	0.316228	NA	NA	NA	NA	0.114	0.114	0.114	NA	NA	NA	0.40361	Chr	1538208	1538208	1538208	0.383	0.383	0.383	94	94	94	0.299852	Chr	1538183	1538038	1538328	0.6435	0.615	0.672	69	-76	214
VNG2094G	0.108096	0.330548	0.43074	0.836253	0.0291321	Chr	1.53822e+06	1538128	1538388	0.785857	0.387	1.732	17.7143	-148	112	0.316228	NA	NA	NA	NA	0.114	0.114	0.114	NA	NA	NA	0.40361	Chr	1538208	1538208	1538208	0.383	0.383	0.383	32	32	32	0.299852	Chr	1538183	1538038	1538328	0.6435	0.615	0.672	57	-88	202
VNG2174H	0.00475308	-0.0891632	-0.0246158	-0.00572701	0.0188704	Chr	1607968	1607788	1608148	1.234	0.978	1.49	66	-114	246	0.316228	NA	NA	NA	NA	0.114	0.114	0.114	NA	NA	NA	0.316228	NA	NA	NA	NA	0.114	0.114	0.114	NA	NA	NA	0.316228	NA	NA	NA	NA	0.114	0.114	0.114	NA	NA	NA
VNG2176H	0.00896317	-0.151227	-0.202662	-0.137995	0.00196845	Chr	1.60999e+06	1609878	1610208	1.63083	0.181	2.771	24.1667	-84	246	0.02837	Chr	1610148	1610148	1610148	0.503	0.503	0.503	186	186	186	0.05094	Chr	1610149	1610149	1610149	1.742	1.742	1.742	186	186	186	0.316228	NA	NA	NA	NA	0.114	0.114	0.114	NA	NA	NA
VNG2177H	-0.0734085	-0.156302	-0.0795701	-0.0517348	0.000232864	Chr	1.61031e+06	1610148	1610578	2.5545	0.181	5.741	-26.75	-184	245	0.02837	Chr	1610148	1610148	1610148	0.503	0.503	0.503	-184	-184	-184	0.05094	Chr	1610149	1610149	1610149	1.742	1.742	1.742	-184	-184	-184	0.316228	NA	NA	NA	NA	0.114	0.114	0.114	NA	NA	NA
VNG2196G	0.0438825	-0.0369106	0.156742	-0.169786	0.04755	Chr	1627988	1627988	1627988	0.517	0.517	0.517	32	32	32	0.316228	NA	NA	NA	NA	0.114	0.114	0.114	NA	NA	NA	0.316228	NA	NA	NA	NA	0.114	0.114	0.114	NA	NA	NA	0.316228	NA	NA	NA	NA	0.114	0.114	0.114	NA	NA	NA
VNG2273H	-0.047375	-0.000512721	0.00873008	-0.0176558	0.0313363	Chr	1693444	1693368	1693498	0.802	0.402	1.775	104	28	158	0.316228	NA	NA	NA	NA	0.114	0.114	0.114	NA	NA	NA	0.316228	NA	NA	NA	NA	0.114	0.114	0.114	NA	NA	NA	0.17753	Chr	1693428	1693428	1693428	1.061	1.061	1.061	88	88	88
VNG2292H	0.0774879	0.104406	0.0775585	-0.273406	0.00855308	Chr	1.71035e+06	1710274	1710428	0.8032	0.266	1.857	112.4	38	192	0.00079	Chr	1710308	1710308	1710308	1.492	1.492	1.492	72	72	72	0.00549	Chr	1710318	1710318	1710318	3.771	3.771	3.771	82	82	82	0.04681	Chr	1710338	1710338	1710338	2.571	2.571	2.571	102	102	102
VNG2293G	0.000336099	-0.066852	0.0279435	0.0607367	0.0924348	Chr	1710852	1710819	1710908	0.617667	0.242	1.294	19.3333	-14	76	0.02443	Chr	1710988	1710988	1710988	0.52	0.52	0.52	155	155	155	0.34483	Chr	1711023	1711023	1711023	0.563	0.563	0.563	190	190	190	0.2085	Chr	1710938	1710938	1710938	0.891	0.891	0.891	105	105	105
VNG2294G	0.093696	0.0109996	-0.0627002	-0.0487988	0.0924348	Chr	1710852	1710819	1710908	0.617667	0.242	1.294	124	68	157	0.02443	Chr	1710988	1710988	1710988	0.52	0.52	0.52	-12	-12	-12	0.34483	Chr	1711023	1711023	1711023	0.563	0.563	0.563	-47	-47	-47	0.2085	Chr	1710938	1710938	1710938	0.891	0.891	0.891	38	38	38
VNG2543C	0.050604	0.229966	0.0372048	0.159396	0.0117342	Chr	1.90703e+06	1906988	1907108	0.984143	0.206	1.598	107.857	62	182	0.43893	Chr	1907108	1907108	1907108	0.185	0.185	0.185	182	182	182	0.29545	Chr	1906988	1906988	1906988	0.694	0.694	0.694	62	62	62	0.1552	Chr	1906958	1906958	1906958	1.234	1.234	1.234	32	32	32
VNG2544H	-0.0328007	-0.0819226	0.00495762	0.0495804	0.0270949	Chr	1.90704e+06	1906998	1907108	0.881833	0.206	1.318	-46.5	-90	20	0.43893	Chr	1907108	1907108	1907108	0.185	0.185	0.185	20	20	20	0.316228	NA	NA	NA	NA	0.114	0.114	0.114	NA	NA	NA	0.316228	NA	NA	NA	NA	0.114	0.114	0.114	NA	NA	NA
VNG2652H	-0.0748385	0.0416763	0.0366192	0.0131406	0.00445749	Chr	1.98933e+06	1989178	1989398	1.16314	0.15	2.578	115.286	-36	184	0.316228	NA	NA	NA	NA	0.114	0.114	0.114	NA	NA	NA	0.25157	Chr	1989409	1989409	1989409	0.791	0.791	0.791	194	194	194	0.13474	Chr	1989257	1989059	1989455	1.1055	0.897	1.314	42	-156	240
VNG2653C	-0.0741475	0.434071	0.183122	0.0560915	0.00445749	Chr	1.98933e+06	1989178	1989398	1.16314	0.15	2.578	-97.2857	-166	54	0.316228	NA	NA	NA	NA	0.114	0.114	0.114	NA	NA	NA	0.25157	Chr	1989409	1989409	1989409	0.791	0.791	0.791	-176	-176	-176	0.13474	Chr	1989257	1989059	1989455	1.1055	0.897	1.314	-24	-222	174
VNG2661G	-0.122117	-0.0283869	0.0311969	0.0850447	0.000681286	Chr	2.00235e+06	2002214	2002418	1.5735	0.417	3.126	67.5	-72	132	0.22537	Chr	2002438	2002438	2002438	0.247	0.247	0.247	152	152	152	0.40361	Chr	2002308	2002308	2002308	0.382	0.382	0.382	22	22	22	0.13324	Chr	2002184	2002184	2002184	1.398	1.398	1.398	-102	-102	-102
VNG2662G	-0.0080166	-0.0438192	-0.0123989	-0.00631929	0.000681286	Chr	2.00235e+06	2002214	2002418	1.5735	0.417	3.126	67.5	-72	132	0.22537	Chr	2002438	2002438	2002438	0.247	0.247	0.247	152	152	152	0.40361	Chr	2002308	2002308	2002308	0.382	0.382	0.382	22	22	22	0.13324	Chr	2002184	2002184	2002184	1.398	1.398	1.398	-102	-102	-102
VNG2664G	0.0230547	-0.0397835	-0.00622282	0.0097559	0.000681286	Chr	2.00235e+06	2002214	2002418	1.5735	0.417	3.126	67.5	-72	132	0.22537	Chr	2002438	2002438	2002438	0.247	0.247	0.247	152	152	152	0.40361	Chr	2002308	2002308	2002308	0.382	0.382	0.382	22	22	22	0.13324	Chr	2002184	2002184	2002184	1.398	1.398	1.398	-102	-102	-102
VNG2665G	-0.0342776	-0.0341349	-0.0126263	-0.0240713	0.000681286	Chr	2.00235e+06	2002214	2002418	1.5735	0.417	3.126	67.5	-72	132	0.22537	Chr	2002438	2002438	2002438	0.247	0.247	0.247	152	152	152	0.40361	Chr	2002308	2002308	2002308	0.382	0.382	0.382	22	22	22	0.13324	Chr	2002184	2002184	2002184	1.398	1.398	1.398	-102	-102	-102
VNG2666G	0.0311031	0.0384739	0.00343549	0.0431024	0.000681286	Chr	2.00235e+06	2002214	2002418	1.5735	0.417	3.126	67.5	-72	132	0.22537	Chr	2002438	2002438	2002438	0.247	0.247	0.247	152	152	152	0.40361	Chr	2002308	2002308	2002308	0.382	0.382	0.382	22	22	22	0.13324	Chr	2002184	2002184	2002184	1.398	1.398	1.398	-102	-102	-102
VNG2668G	-0.082433	-0.0886253	-0.0110947	-0.0550186	0.000681286	Chr	2.00235e+06	2002214	2002418	1.5735	0.417	3.126	67.5	-72	132	0.22537	Chr	2002438	2002438	2002438	0.247	0.247	0.247	152	152	152	0.40361	Chr	2002308	2002308	2002308	0.382	0.382	0.382	22	22	22	0.13324	Chr	2002184	2002184	2002184	1.398	1.398	1.398	-102	-102	-102
VNG5135H	-0.0455726	0.00721548	0.0212579	0.0354671	0.00121632	pNRC100	97087.6	97051	97172	1.41214	0.33	3.212	156.429	72	193	0.316228	NA	NA	NA	NA	0.114	0.114	0.114	NA	NA	NA	0.09091	pNRC100	97052	97052	97052	1.469	1.469	1.469	192	192	192	0.11919	pNRC100	97042	97042	97042	1.557	1.557	1.557	202	202	202
VNG5144H	-0.0648045	-0.052285	0.054688	0.0529626	0.00263155	pNRC100	114409	114382	114442	2.626	2.071	3.071	53	20	80	0.316228	NA	NA	NA	NA	0.114	0.114	0.114	NA	NA	NA	0.05094	pNRC100	114392	114392	114392	1.778	1.778	1.778	70	70	70	0.05366	pNRC100	114412	114412	114412	2.427	2.427	2.427	50	50	50
VNG5145H	-0.136028	-0.0190501	-0.0176108	0.0508104	0.0105593	pNRC100	115542	115432	115702	1.38667	1.089	1.606	30	-80	190	0.316228	NA	NA	NA	NA	0.114	0.114	0.114	NA	NA	NA	0.316228	NA	NA	NA	NA	0.114	0.114	0.114	NA	NA	NA	0.27296	pNRC100	115442	115442	115442	0.686	0.686	0.686	-70	-70	-70
VNG5146H	-0.0635573	-0.384521	-0.257879	-0.0664003	0.000120042	pNRC100	115932	115702	116072	1.826	0.955	3.268	-47.5	-188	182	0.07329	pNRC100	116052	116052	116052	0.387	0.387	0.387	-168	-168	-168	0.316228	NA	NA	NA	NA	0.114	0.114	0.114	NA	NA	NA	0.316228	NA	NA	NA	NA	0.114	0.114	0.114	NA	NA	NA
VNG5148H	-0.0762275	-0.0918235	-0.125484	-0.0132111	0.00403505	pNRC100	121064	120953	121159	1.26457	0.494	2.008	-0.428571	-95	111	0.07329	pNRC100	121120	121120	121120	0.393	0.393	0.393	-56	-56	-56	0.03292	pNRC100	121085	121085	121085	2.027	2.027	2.027	-21	-21	-21	0.04033	pNRC100	121137	121137	121137	2.739	2.739	2.739	-73	-73	-73
VNG5156H	-0.0750592	-0.0979796	-0.0173595	0.0245174	0.00108361	pNRC100	126618	126570	126668	1.7868	0.654	4.136	-81.6	-132	-34	0.316228	NA	NA	NA	NA	0.114	0.114	0.114	NA	NA	NA	0.16301	pNRC100	126565	126565	126565	1.104	1.104	1.104	-29	-29	-29	0.03997	pNRC100	126635	126635	126635	2.751	2.751	2.751	-99	-99	-99
VNG5164C	-0.103275	-0.192942	0.145338	0.207244	0.0960518	pNRC100	129175	129102	129232	1.28333	0.751	1.8	8.33333	-49	82	0.16785	pNRC100	129191	129191	129191	0.274	0.274	0.274	-8	-8	-8	0.09326	pNRC100	129202	129202	129202	1.461	1.461	1.461	-18	-18	-18	0.04069	pNRC100	129171	129171	129171	2.726	2.726	2.726	12	12	12
VNG5165H	-0.158221	-0.374944	-0.399491	-0.497611	0.00102154	pNRC100	129867	129822	129912	2.05025	1.628	2.718	204.75	159	250	0.25059	pNRC100	129902	129902	129902	0.237	0.237	0.237	170	170	170	0.13871	pNRC100	129902	129902	129902	1.222	1.222	1.222	169	169	169	0.316228	NA	NA	NA	NA	0.114	0.114	0.114	NA	NA	NA
VNG5168H	-0.0209756	-0.0848651	-0.0466709	0.00807451	0.00031417	pNRC100	131553	131442	131692	1.61643	0.865	2.393	-90.5714	-202	48	0.316228	NA	NA	NA	NA	0.114	0.114	0.114	NA	NA	NA	0.212327	pNRC100	131677	131462	131892	0.8465	0.528	1.165	33	-182	248	0.04681	pNRC100	131432	131432	131432	2.571	2.571	2.571	-212	-212	-212
VNG5169H	-0.309013	-0.570024	-0.519478	-0.43321	0.00031417	pNRC100	131553	131442	131692	1.61643	0.865	2.393	124.571	-14	236	0.316228	NA	NA	NA	NA	0.114	0.114	0.114	NA	NA	NA	0.212327	pNRC100	131677	131462	131892	0.8465	0.528	1.165	1	-214	216	0.04681	pNRC100	131432	131432	131432	2.571	2.571	2.571	246	246	246
VNG5173H	-0.248251	-0.394769	-0.368146	-0.304802	0.0102092	pNRC100	133852	133822	133882	1.402	0.802	2.002	-80	-110	-50	0.316228	NA	NA	NA	NA	0.114	0.114	0.114	NA	NA	NA	0.46708	pNRC100	134042	134042	134042	0.254	0.254	0.254	110	110	110	0.316228	NA	NA	NA	NA	0.114	0.114	0.114	NA	NA	NA
VNG5174H	-0.0475945	-0.0138088	0.0301927	-0.0128778	0.025	pNRC100	133882	133882	133882	0.802	0.802	0.802	206	206	206	0.316228	NA	NA	NA	NA	0.114	0.114	0.114	NA	NA	NA	0.46708	pNRC100	134042	134042	134042	0.254	0.254	0.254	46	46	46	0.316228	NA	NA	NA	NA	0.114	0.114	0.114	NA	NA	NA
VNG5180G	-0.112493	-0.0850502	-0.00324802	0.0188845	0.0217126	pNRC100	139942	139932	139952	2.161	1.071	3.251	218	208	228	0.316228	NA	NA	NA	NA	0.114	0.114	0.114	NA	NA	NA	0.316228	NA	NA	NA	NA	0.114	0.114	0.114	NA	NA	NA	0.05257	pNRC100	139932	139932	139932	2.456	2.456	2.456	208	208	208
VNG5181G	-0.0409704	-0.109029	-0.066086	-0.0309247	0.000104517	pNRC100	140090	139932	140282	2.0132	0.865	3.251	38	-120	230	0.316228	NA	NA	NA	NA	0.114	0.114	0.114	NA	NA	NA	0.316228	NA	NA	NA	NA	0.114	0.114	0.114	NA	NA	NA	0.05257	pNRC100	139932	139932	139932	2.456	2.456	2.456	-120	-120	-120
VNG5182G	-0.047284	-0.0797436	-0.0585994	0.00285324	2.13e-05	pNRC100	140400	140262	140512	2.25233	0.459	3.084	-8.33333	-120	130	0.02049	pNRC100	140412	140412	140412	0.547	0.547	0.547	-20	-20	-20	0.00549	pNRC100	140452	140452	140452	3.719	3.719	3.719	-60	-60	-60	0.00864	pNRC100	140472	140472	140472	4.183	4.183	4.183	-80	-80	-80
VNG5197H	-0.0857361	-0.117381	-0.0616424	-0.101624	6.45e-05	pNRC100	149041	148902	149282	1.859	0.78	2.717	68.6667	-172	208	0.08195	pNRC100	149201	149201	149201	0.369	0.369	0.369	-91	-91	-91	0.0304013	pNRC100	149123	149016	149262	1.34967	0.657	1.706	-13.3333	-152	94	0.01801	pNRC100	149252	149252	149252	3.377	3.377	3.377	-142	-142	-142
VNG5199H	-0.129173	-0.164067	0.0606319	-0.0587668	1.4e-05	pNRC100	152600	152542	152722	3.334	1.982	3.95	-10.5	-68	112	0.316228	NA	NA	NA	NA	0.114	0.114	0.114	NA	NA	NA	0.06897	pNRC100	152552	152552	152552	1.578	1.578	1.578	-58	-58	-58	0.316228	NA	NA	NA	NA	0.114	0.114	0.114	NA	NA	NA
VNG5203C	-0.0535798	-0.108712	-0.20317	-0.161829	0.00254417	pNRC100	154679	154512	154752	1.71417	0.85	3.377	171.167	4	244	0.316228	NA	NA	NA	NA	0.114	0.114	0.114	NA	NA	NA	0.06975	pNRC100	154716	154716	154716	1.575	1.575	1.575	208	208	208	0.11667	pNRC100	154522	154522	154522	1.592	1.592	1.592	14	14	14
VNG6005H	0.0335724	-0.168468	-0.135704	-0.172552	0.03101	pNRC200	1642	1642	1642	2.616	2.616	2.616	-52	-52	-52	0.316228	NA	NA	NA	NA	0.114	0.114	0.114	NA	NA	NA	0.316228	NA	NA	NA	NA	0.114	0.114	0.114	NA	NA	NA	0.316228	NA	NA	NA	NA	0.114	0.114	0.114	NA	NA	NA
VNG6143H	-0.139337	-0.101313	-0.0279075	0.0274956	0.0195701	pNRC200	118114	118092	118131	1.2052	0.145	2.765	87.6	66	105	0.00079	pNRC200	118142	118142	118142	1.04	1.04	1.04	116	116	116	0.01646	pNRC200	118132	118132	118132	2.541	2.541	2.541	106	106	106	0.04681	pNRC200	118112	118112	118112	2.558	2.558	2.558	86	86	86
VNG6148H	-0.10105	-0.167926	-0.0342832	-0.00179798	0.0160992	pNRC200	124918	124868	124968	1.031	0.284	1.778	45	-5	95	0.316228	NA	NA	NA	NA	0.114	0.114	0.114	NA	NA	NA	0.316228	NA	NA	NA	NA	0.114	0.114	0.114	NA	NA	NA	0.316228	NA	NA	NA	NA	0.114	0.114	0.114	NA	NA	NA
VNG6149H	-0.0393249	-0.0248352	-0.0258456	-0.0162793	0.0098	pNRC200	127582	127582	127582	1.698	1.698	1.698	-242	-242	-242	0.316228	NA	NA	NA	NA	0.114	0.114	0.114	NA	NA	NA	0.316228	NA	NA	NA	NA	0.114	0.114	0.114	NA	NA	NA	0.316228	NA	NA	NA	NA	0.114	0.114	0.114	NA	NA	NA
VNG6150G	-0.0862743	-0.168901	-0.0888843	-0.0442962	0.02763	pNRC200	129352	129352	129352	2.527	2.527	2.527	52	52	52	0.12845	pNRC200	129352	129352	129352	0.297	0.297	0.297	52	52	52	0.05094	pNRC200	129242	129242	129242	1.772	1.772	1.772	162	162	162	0.316228	NA	NA	NA	NA	0.114	0.114	0.114	NA	NA	NA
VNG6153G	-0.0936088	-0.0790597	0.0767006	0.0656922	0.00104293	pNRC200	130782	130682	130882	2.1825	1.172	3.193	74	-26	174	0.40347	pNRC200	130802	130802	130802	0.194	0.194	0.194	54	54	54	0.316228	NA	NA	NA	NA	0.114	0.114	0.114	NA	NA	NA	0.316228	NA	NA	NA	NA	0.114	0.114	0.114	NA	NA	NA
VNG6157H	-0.16906	-0.333443	-0.168646	-0.183893	0.000792942	pNRC200	135942	135872	136142	1.8805	0.892	2.694	-46	-116	154	0.316228	NA	NA	NA	NA	0.114	0.114	0.114	NA	NA	NA	0.280856	pNRC200	136062	135892	136232	0.728	0.631	0.825	74	-96	244	0.316228	NA	NA	NA	NA	0.114	0.114	0.114	NA	NA	NA
VNG6158H	-0.0438322	-0.0942923	-0.0401208	-0.145066	0.0203006	pNRC200	136197	136142	136252	1.005	0.892	1.118	-89	-144	-34	0.316228	NA	NA	NA	NA	0.114	0.114	0.114	NA	NA	NA	0.24451	pNRC200	136232	136232	136232	0.825	0.825	0.825	-54	-54	-54	0.316228	NA	NA	NA	NA	0.114	0.114	0.114	NA	NA	NA
VNG6159H	-0.0643163	-0.0392115	-0.0379133	0.00140517	0.04853	pNRC200	136772	136772	136772	0.494	0.494	0.494	48	48	48	0.316228	NA	NA	NA	NA	0.114	0.114	0.114	NA	NA	NA	0.316228	NA	NA	NA	NA	0.114	0.114	0.114	NA	NA	NA	0.316228	NA	NA	NA	NA	0.114	0.114	0.114	NA	NA	NA
VNG6160H	-0.155725	-0.216237	-0.101249	-0.0808213	0.04853	pNRC200	136772	136772	136772	0.494	0.494	0.494	-180	-180	-180	0.316228	NA	NA	NA	NA	0.114	0.114	0.114	NA	NA	NA	0.316228	NA	NA	NA	NA	0.114	0.114	0.114	NA	NA	NA	0.316228	NA	NA	NA	NA	0.114	0.114	0.114	NA	NA	NA
VNG6162H	-0.0753074	-0.160014	-0.183296	-0.315779	0.04167	pNRC200	139042	139042	139042	0.567	0.567	0.567	-32	-32	-32	0.316228	NA	NA	NA	NA	0.114	0.114	0.114	NA	NA	NA	0.316228	NA	NA	NA	NA	0.114	0.114	0.114	NA	NA	NA	0.316228	NA	NA	NA	NA	0.114	0.114	0.114	NA	NA	NA
VNG6170H	-0.00877548	-0.0621659	-0.00292163	-0.0337901	0.04925	pNRC200	143582	143582	143582	2.125	2.125	2.125	166	166	166	0.316228	NA	NA	NA	NA	0.114	0.114	0.114	NA	NA	NA	0.316228	NA	NA	NA	NA	0.114	0.114	0.114	NA	NA	NA	0.316228	NA	NA	NA	NA	0.114	0.114	0.114	NA	NA	NA
VNG6171H	-0.0499091	-0.0247644	-0.0468958	-0.0334705	0.00541078	pNRC200	143814	143582	143992	1.54175	1.047	2.125	-54.5	-232	178	0.316228	NA	NA	NA	NA	0.114	0.114	0.114	NA	NA	NA	0.17947	pNRC200	143962	143962	143962	1.039	1.039	1.039	-202	-202	-202	0.316228	NA	NA	NA	NA	0.114	0.114	0.114	NA	NA	NA
VNG6173C	-0.00947224	0.0507411	0.0473021	0.0355332	0.00541078	pNRC200	143814	143582	143992	1.54175	1.047	2.125	-54.5	-232	178	0.316228	NA	NA	NA	NA	0.114	0.114	0.114	NA	NA	NA	0.17947	pNRC200	143962	143962	143962	1.039	1.039	1.039	-202	-202	-202	0.316228	NA	NA	NA	NA	0.114	0.114	0.114	NA	NA	NA
VNG6175G	-0.0322134	-0.00558651	0.0441711	0.0205564	0.01471	pNRC200	147272	147272	147272	1.167	1.167	1.167	136	136	136	0.49961	pNRC200	147372	147372	147372	0.172	0.172	0.172	236	236	236	0.14107	pNRC200	147252	147252	147252	1.215	1.215	1.215	116	116	116	0.06158	pNRC200	147022	147022	147022	2.299	2.299	2.299	-114	-114	-114
VNG6176G	-0.0158151	-0.0148483	-0.0336105	0.055045	0.00840469	pNRC200	147477	147272	147692	0.8155	0.499	1.167	-3	-218	202	0.49961	pNRC200	147372	147372	147372	0.172	0.172	0.172	102	102	102	0.14107	pNRC200	147252	147252	147252	1.215	1.215	1.215	222	222	222	0.316228	NA	NA	NA	NA	0.114	0.114	0.114	NA	NA	NA
VNG6180H	0.0424327	-0.054006	-0.0451821	0.00501755	0.0328904	pNRC200	153430	153312	153502	1.014	0.178	2.125	-165.5	-238	-48	0.316228	NA	NA	NA	NA	0.114	0.114	0.114	NA	NA	NA	0.29702	pNRC200	153512	153512	153512	0.686	0.686	0.686	-248	-248	-248	0.316228	NA	NA	NA	NA	0.114	0.114	0.114	NA	NA	NA
VNG6183C	0.119632	-0.000909595	-0.196981	-0.350573	0.00807337	pNRC200	157242	157232	157262	1.77733	0.864	2.353	-146	-156	-126	0.316228	NA	NA	NA	NA	0.114	0.114	0.114	NA	NA	NA	0.14969	pNRC200	157222	157222	157222	1.168	1.168	1.168	-166	-166	-166	0.04141	pNRC200	157312	157312	157312	2.711	2.711	2.711	-76	-76	-76
VNG6184G	-0.127668	-0.0313497	0.0717883	0.0330823	0.0185083	pNRC200	158477	158292	158662	1.074	0.77	1.378	-11	-196	174	0.316228	NA	NA	NA	NA	0.114	0.114	0.114	NA	NA	NA	0.1348	pNRC200	158582	158582	158582	1.262	1.262	1.262	94	94	94	0.03349	pNRC200	158392	158392	158392	2.918	2.918	2.918	-96	-96	-96
VNG6185H	-0.0152661	-0.0415836	0.0166842	0.0759494	0.02598	pNRC200	158662	158662	158662	0.77	0.77	0.77	-8	-8	-8	0.316228	NA	NA	NA	NA	0.114	0.114	0.114	NA	NA	NA	0.1348	pNRC200	158582	158582	158582	1.262	1.262	1.262	-88	-88	-88	0.316228	NA	NA	NA	NA	0.114	0.114	0.114	NA	NA	NA
VNG6186H	0.0266828	-0.0110176	-0.0470902	-0.0310527	0.02598	pNRC200	158662	158662	158662	0.77	0.77	0.77	216	216	216	0.316228	NA	NA	NA	NA	0.114	0.114	0.114	NA	NA	NA	0.316228	NA	NA	NA	NA	0.114	0.114	0.114	NA	NA	NA	0.316228	NA	NA	NA	NA	0.114	0.114	0.114	NA	NA	NA
VNG6187G	-0.0146664	0.0181289	0.0220763	0.00769768	0.00327122	pNRC200	159586	159522	159642	0.9804	0.483	2.278	-180	-236	-116	0.316228	NA	NA	NA	NA	0.114	0.114	0.114	NA	NA	NA	0.316228	NA	NA	NA	NA	0.114	0.114	0.114	NA	NA	NA	0.316228	NA	NA	NA	NA	0.114	0.114	0.114	NA	NA	NA
VNG6193H	-0.0888233	-0.0596461	-0.00766039	0.0874133	0.0112642	pNRC200	162167	162112	162222	1.352	0.98	1.724	155	100	210	0.316228	NA	NA	NA	NA	0.114	0.114	0.114	NA	NA	NA	0.316228	NA	NA	NA	NA	0.114	0.114	0.114	NA	NA	NA	0.316228	NA	NA	NA	NA	0.114	0.114	0.114	NA	NA	NA
VNG6194H	0.0401069	-0.0849844	0.020692	0.0670765	0.0112642	pNRC200	162167	162112	162222	1.352	0.98	1.724	-33	-88	22	0.316228	NA	NA	NA	NA	0.114	0.114	0.114	NA	NA	NA	0.316228	NA	NA	NA	NA	0.114	0.114	0.114	NA	NA	NA	0.316228	NA	NA	NA	NA	0.114	0.114	0.114	NA	NA	NA
VNG6195H	-0.0765517	-0.199859	-0.0690503	-0.0531343	0.0102719	pNRC200	162330	162322	162352	1.5735	0.946	2.153	-238.5	-246	-216	0.46966	pNRC200	162382	162382	162382	0.178	0.178	0.178	-186	-186	-186	0.16458	pNRC200	162352	162352	162352	1.09	1.09	1.09	-216	-216	-216	0.316228	NA	NA	NA	NA	0.114	0.114	0.114	NA	NA	NA
VNG6198H	-0.00899907	0.168982	0.295303	0.724061	0.011647	pNRC200	163986	163902	164022	1.1694	0.561	2.038	20	-16	104	0.316228	NA	NA	NA	NA	0.114	0.114	0.114	NA	NA	NA	0.316228	NA	NA	NA	NA	0.114	0.114	0.114	NA	NA	NA	0.316228	NA	NA	NA	NA	0.114	0.114	0.114	NA	NA	NA
VNG6201G	-0.00492951	0.0133109	0.0126328	0.10513	2.54e-05	pNRC200	166946	166762	167012	1.29922	0.442	2.197	105.556	-78	172	0.00079	pNRC200	167022	167022	167022	1.878	1.878	1.878	182	182	182	0.00078	pNRC200	167012	167012	167012	5.304	5.304	5.304	172	172	172	0.00036	pNRC200	167002	167002	167002	12.132	12.132	12.132	162	162	162
VNG6266H	-0.0467689	-0.0821873	-0.00992807	0.0502441	6.26e-05	pNRC200	206005	205890	206090	2.1005	0.756	3.094	159	44	244	0.49724	pNRC200	206090	206090	206090	0.173	0.173	0.173	244	244	244	0.16771	pNRC200	206080	206080	206080	1.077	1.077	1.077	234	234	234	0.13468	pNRC200	205990	205990	205990	1.383	1.383	1.383	144	144	144
VNG6286H	0.0238341	-0.0825705	-0.0146371	0.0445311	0.0375181	pNRC200	219985	219932	220022	0.996333	0.348	1.966	212	158	249	0.316228	NA	NA	NA	NA	0.114	0.114	0.114	NA	NA	NA	0.316228	NA	NA	NA	NA	0.114	0.114	0.114	NA	NA	NA	0.316228	NA	NA	NA	NA	0.114	0.114	0.114	NA	NA	NA
VNG6287H	-0.0222274	-0.0614273	-0.0332169	-0.0215642	0.00281249	pNRC200	220074	219932	220172	1.29943	0.348	2.231	-104.429	-202	38	0.316228	NA	NA	NA	NA	0.114	0.114	0.114	NA	NA	NA	0.19514	pNRC200	220127	220127	220127	0.986	0.986	0.986	-157	-157	-157	0.316228	NA	NA	NA	NA	0.114	0.114	0.114	NA	NA	NA
VNG6288C	-0.00119464	-0.0513672	-0.00353284	-0.0588311	0.001976	pNRC200	220098	220002	220172	1.4035	0.348	2.231	135	62	231	0.316228	NA	NA	NA	NA	0.114	0.114	0.114	NA	NA	NA	0.19514	pNRC200	220127	220127	220127	0.986	0.986	0.986	106	106	106	0.10335	pNRC200	220216	220216	220216	1.75	1.75	1.75	17	17	17
VNG6291H	-0.053036	-0.0831968	0.042254	0.0227697	0.00111404	pNRC200	222819	222662	222982	1.37725	0.394	2.526	61.125	-96	224	0.316228	NA	NA	NA	NA	0.114	0.114	0.114	NA	NA	NA	0.11129	pNRC200	222942	222942	222942	1.371	1.371	1.371	184	184	184	0.316228	NA	NA	NA	NA	0.114	0.114	0.114	NA	NA	NA
VNG6292C	-0.00783042	-0.0453282	-0.0177568	-0.0463414	0.00392476	pNRC200	223407	223292	223502	1.5015	0.586	2.621	37	-78	132	0.316228	NA	NA	NA	NA	0.114	0.114	0.114	NA	NA	NA	0.32445	pNRC200	223532	223532	223532	0.632	0.632	0.632	162	162	162	0.316228	NA	NA	NA	NA	0.114	0.114	0.114	NA	NA	NA
VNG6294G	-0.110777	-0.0679953	0.0250403	0.0441609	0.000760098	pNRC200	227277	227242	227302	1.604	0.711	2.96	104.833	70	130	0.316228	NA	NA	NA	NA	0.114	0.114	0.114	NA	NA	NA	0.39812	pNRC200	227232	227232	227232	0.401	0.401	0.401	60	60	60	0.09003	pNRC200	227262	227262	227262	1.878	1.878	1.878	90	90	90
VNG6297C	-0.0176232	-0.18518	-0.0968772	-0.199777	0.0361637	pNRC200	228872	228822	228932	0.838333	0.335	1.505	-184	-244	-134	0.316228	NA	NA	NA	NA	0.114	0.114	0.114	NA	NA	NA	0.36364	pNRC200	228912	228912	228912	0.52	0.52	0.52	-224	-224	-224	0.316228	NA	NA	NA	NA	0.114	0.114	0.114	NA	NA	NA
VNG6298C	0.112709	0.479099	0.0216735	-0.337134	0.04706	pNRC200	229782	229782	229782	0.524	0.524	0.524	218	218	218	0.316228	NA	NA	NA	NA	0.114	0.114	0.114	NA	NA	NA	0.316228	NA	NA	NA	NA	0.114	0.114	0.114	NA	NA	NA	0.4206	pNRC200	230102	230102	230102	0.482	0.482	0.482	-102	-102	-102
VNG6308G	-0.12999	-0.0508375	0.0214788	0.025376	0.00551975	pNRC200	239264	239242	239282	1.1905	0.629	1.775	-7.83333	-30	10	0.316228	NA	NA	NA	NA	0.114	0.114	0.114	NA	NA	NA	0.39342	pNRC200	239272	239272	239272	0.418	0.418	0.418	0	0	0	0.14224	pNRC200	239242	239242	239242	1.338	1.338	1.338	-30	-30	-30
VNG6309G	-0.092539	-0.000516431	0.0136072	0.0217928	0.00551975	pNRC200	239264	239242	239282	1.1905	0.629	1.775	37.8333	20	60	0.316228	NA	NA	NA	NA	0.114	0.114	0.114	NA	NA	NA	0.39342	pNRC200	239272	239272	239272	0.418	0.418	0.418	30	30	30	0.14224	pNRC200	239242	239242	239242	1.338	1.338	1.338	60	60	60
VNG6312G	0.400887	0.669374	1.06683	0.846764	0.0191231	pNRC200	240833	240772	240892	0.9995	0.313	1.636	80.8333	22	142	0.04492	pNRC200	240702	240702	240702	0.445	0.445	0.445	212	212	212	0.08464	pNRC200	240772	240772	240772	1.482	1.482	1.482	142	142	142	0.06914	pNRC200	240742	240742	240742	2.157	2.157	2.157	172	172	172
VNG6313G	0.406396	0.629499	0.585344	0.376812	0.0333102	pNRC200	244397	244312	244476	0.863	0.373	1.458	-20.2	-105	59	0.24665	pNRC200	244522	244522	244522	0.239	0.239	0.239	105	105	105	0.16223	pNRC200	244322	244322	244322	1.107	1.107	1.107	-95	-95	-95	0.299829	pNRC200	244367	244322	244412	0.6775	0.5	0.855	-50	-95	-5
VNG6318G	0.00665025	-0.0610185	0.0357115	0.0088543	0.0353901	pNRC200	249364	249202	249432	1.2016	0.394	1.657	106	-56	174	0.316228	NA	NA	NA	NA	0.114	0.114	0.114	NA	NA	NA	0.27038	pNRC200	249422	249422	249422	0.753	0.753	0.753	165	165	165	0.27872	pNRC200	249162	249162	249162	0.669	0.669	0.669	-96	-96	-96
VNG6320C	-0.00505805	-0.0173557	-0.0395871	0.051585	0.0454828	pNRC200	250612	250562	250662	1.03233	0.579	1.34	-16	-66	34	0.316228	NA	NA	NA	NA	0.114	0.114	0.114	NA	NA	NA	0.316228	NA	NA	NA	NA	0.114	0.114	0.114	NA	NA	NA	0.316228	NA	NA	NA	NA	0.114	0.114	0.114	NA	NA	NA
VNG6322H	0.131243	-0.058449	-0.109466	-0.127408	0.000109648	pNRC200	254679	254512	254871	1.529	0.71	2.374	-51	-218	141	0.12372	pNRC200	254622	254622	254622	0.304	0.304	0.304	-108	-108	-108	0.168765	pNRC200	254752	254612	254892	0.963	0.76	1.166	22	-118	162	0.07094	pNRC200	254792	254792	254792	2.124	2.124	2.124	62	62	62
VNG6323H	0.0617853	-0.110051	-0.195552	-0.208674	0.00963009	pNRC200	254846	254822	254871	1.478	0.752	2.204	196.5	172	221	0.316228	NA	NA	NA	NA	0.114	0.114	0.114	NA	NA	NA	0.26724	pNRC200	254892	254892	254892	0.76	0.76	0.76	152	152	152	0.316228	NA	NA	NA	NA	0.114	0.114	0.114	NA	NA	NA
VNG6329H	0.206895	0.240485	0.406368	0.949861	0.000837553	pNRC200	265017	264842	265192	1.5145	0.433	3.17	47	-128	222	0.04177	pNRC200	265142	265142	265142	0.452	0.452	0.452	172	172	172	0.05799	pNRC200	264912	264912	264912	1.646	1.646	1.646	-58	-58	-58	0.316228	NA	NA	NA	NA	0.114	0.114	0.114	NA	NA	NA
VNG6330H	0.951935	0.466779	0.311567	0.668437	5.26e-05	pNRC200	265144	264902	265262	2.0972	0.602	3.17	-44	-162	198	0.04177	pNRC200	265142	265142	265142	0.452	0.452	0.452	-42	-42	-42	0.05799	pNRC200	264912	264912	264912	1.646	1.646	1.646	188	188	188	0.316228	NA	NA	NA	NA	0.114	0.114	0.114	NA	NA	NA
VNG6334H	1.10814	1.01335	0.282003	-0.131095	0.00735	pNRC200	267282	267282	267282	2.174	2.174	2.174	160	160	160	0.31836	pNRC200	267512	267512	267512	0.217	0.217	0.217	-70	-70	-70	0.316228	NA	NA	NA	NA	0.114	0.114	0.114	NA	NA	NA	0.316228	NA	NA	NA	NA	0.114	0.114	0.114	NA	NA	NA
VNG6337G	-0.0375241	-0.0215121	0.0592349	0.00034576	0.00196	pNRC200	269752	269752	269752	2.62	2.62	2.62	98	98	98	0.316228	NA	NA	NA	NA	0.114	0.114	0.114	NA	NA	NA	0.316228	NA	NA	NA	NA	0.114	0.114	0.114	NA	NA	NA	0.316228	NA	NA	NA	NA	0.114	0.114	0.114	NA	NA	NA
VNG6339H	0.166594	-0.09002	0.249033	0.252388	0.00141328	pNRC200	269869	269752	269986	1.763	0.906	2.62	52.5	-65	170	0.316228	NA	NA	NA	NA	0.114	0.114	0.114	NA	NA	NA	0.316228	NA	NA	NA	NA	0.114	0.114	0.114	NA	NA	NA	0.316228	NA	NA	NA	NA	0.114	0.114	0.114	NA	NA	NA
VNG6340H	0.1131	-0.09625	0.0525929	0.0694741	0.0299	pNRC200	270442	270442	270442	0.711	0.711	0.711	20	20	20	0.316228	NA	NA	NA	NA	0.114	0.114	0.114	NA	NA	NA	0.316228	NA	NA	NA	NA	0.114	0.114	0.114	NA	NA	NA	0.316228	NA	NA	NA	NA	0.114	0.114	0.114	NA	NA	NA
VNG6343H	0.701695	-0.0384593	-0.182783	-0.551523	0.000694356	pNRC200	275562	275452	275722	2.07933	1.091	3.476	-62	-172	98	0.316228	NA	NA	NA	NA	0.114	0.114	0.114	NA	NA	NA	0.316228	NA	NA	NA	NA	0.114	0.114	0.114	NA	NA	NA	0.316228	NA	NA	NA	NA	0.114	0.114	0.114	NA	NA	NA
VNG6344H	-0.078217	-0.0495429	-0.0501189	0.00120478	0.00382489	pNRC200	276199	276132	276272	1.53567	0.714	2.146	92.6667	26	166	0.316228	NA	NA	NA	NA	0.114	0.114	0.114	NA	NA	NA	0.13871	pNRC200	276222	276222	276222	1.226	1.226	1.226	116	116	116	0.316228	NA	NA	NA	NA	0.114	0.114	0.114	NA	NA	NA
VNG6346H	-0.0811136	0.00748696	-0.00315634	0.0538302	0.000893211	pNRC200	278434	278282	278672	2.04725	1.393	2.92	-65.5	-218	172	0.316228	NA	NA	NA	NA	0.114	0.114	0.114	NA	NA	NA	0.316228	NA	NA	NA	NA	0.114	0.114	0.114	NA	NA	NA	0.316228	NA	NA	NA	NA	0.114	0.114	0.114	NA	NA	NA
VNG6347H	0.110917	-0.0426777	-0.0604027	0.131937	0.00600895	pNRC200	278557	278332	278772	1.43625	0.476	2.256	3	-212	228	0.316228	NA	NA	NA	NA	0.114	0.114	0.114	NA	NA	NA	0.316228	NA	NA	NA	NA	0.114	0.114	0.114	NA	NA	NA	0.316228	NA	NA	NA	NA	0.114	0.114	0.114	NA	NA	NA
VNG6348H	-0.0626449	-0.0617679	0.0322278	0.0498829	0.00149186	pNRC200	279562	279422	279762	1.3476	0.351	2.646	-92	-232	108	0.316228	NA	NA	NA	NA	0.114	0.114	0.114	NA	NA	NA	0.316228	NA	NA	NA	NA	0.114	0.114	0.114	NA	NA	NA	0.316228	NA	NA	NA	NA	0.114	0.114	0.114	NA	NA	NA
VNG6349C	0.0147324	0.0165954	0.0852376	-0.0517941	0.00730997	pNRC200	282020	281942	282092	1.351	0.477	2.041	69.5	-8	142	0.316228	NA	NA	NA	NA	0.114	0.114	0.114	NA	NA	NA	0.429748	pNRC200	281952	281782	282122	0.446	0.291	0.601	2	-168	172	0.41736	pNRC200	281742	281742	281742	0.484	0.484	0.484	-208	-208	-208
VNG6354G	-0.0347879	-0.0081141	0.0211239	0.0382529	0.00514132	pNRC200	285197	285182	285212	1.7415	1.208	2.275	229	214	244	0.316228	NA	NA	NA	NA	0.114	0.114	0.114	NA	NA	NA	0.24608	pNRC200	285192	285192	285192	0.815	0.815	0.815	224	224	224	0.316228	NA	NA	NA	NA	0.114	0.114	0.114	NA	NA	NA
VNG6357H	0.00814013	-0.01989	-0.0078525	-0.00969537	0.0204057	pNRC200	286434	286417	286452	0.373	0.249	0.497	-9	-26	8	0.316228	NA	NA	NA	NA	0.114	0.114	0.114	NA	NA	NA	0.316228	NA	NA	NA	NA	0.114	0.114	0.114	NA	NA	NA	0.316228	NA	NA	NA	NA	0.114	0.114	0.114	NA	NA	NA
VNG6359H	-0.0925293	-0.161499	-0.113055	-0.269187	0.0204057	pNRC200	286434	286417	286452	0.373	0.249	0.497	167.5	150	185	0.316228	NA	NA	NA	NA	0.114	0.114	0.114	NA	NA	NA	0.316228	NA	NA	NA	NA	0.114	0.114	0.114	NA	NA	NA	0.316228	NA	NA	NA	NA	0.114	0.114	0.114	NA	NA	NA
VNG6361G	0.0265813	-0.0250183	-0.0105625	-0.00259733	0.0109655	pNRC200	287289	287272	287302	1.12367	0.536	1.97	215.333	202	232	0.316228	NA	NA	NA	NA	0.114	0.114	0.114	NA	NA	NA	0.39577	pNRC200	287382	287382	287382	0.408	0.408	0.408	122	122	122	0.316228	NA	NA	NA	NA	0.114	0.114	0.114	NA	NA	NA
VNG6363G	0.0235942	-0.0614968	-0.0865348	-0.10035	0.0467758	pNRC200	292537	292392	292792	0.84275	0.479	1.251	-85	-230	170	0.316228	NA	NA	NA	NA	0.114	0.114	0.114	NA	NA	NA	0.221	pNRC200	292542	292542	292542	0.91	0.91	0.91	-80	-80	-80	0.316228	NA	NA	NA	NA	0.114	0.114	0.114	NA	NA	NA
VNG6364H	-0.0975251	-0.0168354	0.0630256	0.0217771	0.00622965	pNRC200	293852	293812	293892	1.648	1.625	1.671	-136	-176	-96	0.316228	NA	NA	NA	NA	0.114	0.114	0.114	NA	NA	NA	0.316228	NA	NA	NA	NA	0.114	0.114	0.114	NA	NA	NA	0.316228	NA	NA	NA	NA	0.114	0.114	0.114	NA	NA	NA
VNG6367H	-0.111383	-0.143844	-0.0449805	-0.0153221	0.016695	pNRC200	295727	295612	295842	0.966	0.458	1.474	-123	-238	-8	0.316228	NA	NA	NA	NA	0.114	0.114	0.114	NA	NA	NA	0.316228	NA	NA	NA	NA	0.114	0.114	0.114	NA	NA	NA	0.316228	NA	NA	NA	NA	0.114	0.114	0.114	NA	NA	NA
VNG6370H	-0.0712661	-0.0552938	0.059517	-0.056965	0.0110331	pNRC200	297715	297602	297822	1.052	0.325	2.183	75.2857	-38	182	0.316228	NA	NA	NA	NA	0.114	0.114	0.114	NA	NA	NA	0.43495	pNRC200	297822	297822	297822	0.301	0.301	0.301	182	182	182	0.12604	pNRC200	297612	297612	297612	1.476	1.476	1.476	-28	-28	-28
VNG6371G	-0.119327	-0.0367698	0.115711	0.0772427	0.0160505	pNRC200	297791	297602	298082	0.8457	0.158	2.183	56.7	-234	246	0.316228	NA	NA	NA	NA	0.114	0.114	0.114	NA	NA	NA	0.513182	pNRC200	297857	297822	297892	0.2905	0.28	0.301	-9	-44	26	0.115236	pNRC200	297762	297612	297912	1.2215	0.967	1.476	86	-64	236
VNG6372H	0.0148751	0.0297015	-0.0400728	0.0204816	0.00329787	pNRC200	299393	299312	299532	1.369	0.537	3.801	-76.5714	-158	62	0.316228	NA	NA	NA	NA	0.114	0.114	0.114	NA	NA	NA	0.25078	pNRC200	299362	299362	299362	0.795	0.795	0.795	-108	-108	-108	0.04069	pNRC200	299332	299332	299332	2.719	2.719	2.719	-138	-138	-138
VNG6373G	-0.108086	-0.201546	-0.217437	-0.389425	0.00932555	pNRC200	299424	299372	299532	1.3166	0.537	3.801	168	60	220	0.316228	NA	NA	NA	NA	0.114	0.114	0.114	NA	NA	NA	0.25078	pNRC200	299362	299362	299362	0.795	0.795	0.795	230	230	230	0.316228	NA	NA	NA	NA	0.114	0.114	0.114	NA	NA	NA
VNG6381H	-0.0375049	-0.0725792	-0.0165639	-0.0400707	0.0417505	pNRC200	304449	304362	304532	0.645667	0.331	0.865	156.667	70	240	0.43893	pNRC200	304262	304262	304262	0.185	0.185	0.185	-30	-30	-30	0.20846	pNRC200	304212	304212	304212	0.934	0.934	0.934	-80	-80	-80	0.18473	pNRC200	304522	304522	304522	1.01	1.01	1.01	230	230	230
VNG6383G	-0.0236858	0.0203321	-0.0186992	0.0062433	0.0417505	pNRC200	304449	304362	304532	0.645667	0.331	0.865	59.3333	-24	146	0.43893	pNRC200	304262	304262	304262	0.185	0.185	0.185	246	246	246	0.316228	NA	NA	NA	NA	0.114	0.114	0.114	NA	NA	NA	0.18473	pNRC200	304522	304522	304522	1.01	1.01	1.01	-14	-14	-14
VNG6385H	-0.110971	-0.733294	-0.738641	-1.61084	0.00746006	pNRC200	307057	306972	307132	1.34067	0.198	3.227	165	80	240	0.316228	NA	NA	NA	NA	0.114	0.114	0.114	NA	NA	NA	0.37461	pNRC200	307132	307132	307132	0.475	0.475	0.475	240	240	240	0.08102	pNRC200	307032	307032	307032	1.964	1.964	1.964	140	140	140
VNG6387H	-0.194225	-0.0685807	0.0810929	0.0337899	0.0331211	pNRC200	307162	307082	307272	0.781667	0.673	0.905	-164	-244	-54	0.316228	NA	NA	NA	NA	0.114	0.114	0.114	NA	NA	NA	0.37461	pNRC200	307132	307132	307132	0.475	0.475	0.475	-194	-194	-194	0.316228	NA	NA	NA	NA	0.114	0.114	0.114	NA	NA	NA
VNG6390H	0.0320413	-0.0767693	-0.0903263	-0.0682489	0.01422	pNRC200	308942	308942	308942	1.227	1.227	1.227	202	202	202	0.316228	NA	NA	NA	NA	0.114	0.114	0.114	NA	NA	NA	0.316228	NA	NA	NA	NA	0.114	0.114	0.114	NA	NA	NA	0.316228	NA	NA	NA	NA	0.114	0.114	0.114	NA	NA	NA
VNG6396H	-0.126546	-0.219512	-0.0906292	-0.184239	0.0118563	pNRC200	311234	311142	311342	1.428	0.501	2.717	11.5	-96	104	0.316228	NA	NA	NA	NA	0.114	0.114	0.114	NA	NA	NA	0.316228	NA	NA	NA	NA	0.114	0.114	0.114	NA	NA	NA	0.0821	pNRC200	311072	311072	311072	1.955	1.955	1.955	174	174	174
VNG6408G	-0.0615022	-0.0798233	-0.0107155	-0.170351	0.00198425	pNRC200	317460	317292	317572	1.41733	0.732	2.354	-32.3333	-144	136	0.316228	NA	NA	NA	NA	0.114	0.114	0.114	NA	NA	NA	0.19044	pNRC200	317582	317582	317582	0.995	0.995	0.995	-154	-154	-154	0.316228	NA	NA	NA	NA	0.114	0.114	0.114	NA	NA	NA
VNG6412H	-0.110842	-0.257075	-0.084157	-0.150312	0.000711793	pNRC200	319705	319611	319822	1.67267	0.702	3.438	-111.833	-206	4	0.316228	NA	NA	NA	NA	0.114	0.114	0.114	NA	NA	NA	0.22335	pNRC200	319632	319632	319632	0.908	0.908	0.908	-185	-185	-185	0.316228	NA	NA	NA	NA	0.114	0.114	0.114	NA	NA	NA
VNG6427H	-0.124624	-0.273265	-0.194555	-0.246527	0.02108	pNRC200	326234	326234	326234	0.963	0.963	0.963	184	184	184	0.316228	NA	NA	NA	NA	0.114	0.114	0.114	NA	NA	NA	0.316228	NA	NA	NA	NA	0.114	0.114	0.114	NA	NA	NA	0.316228	NA	NA	NA	NA	0.114	0.114	0.114	NA	NA	NA
VNG6431H	-0.113111	-0.107754	-0.0200621	-0.0285946	0.04706	pNRC200	327714	327714	327714	2.169	2.169	2.169	-215	-215	-215	0.316228	NA	NA	NA	NA	0.114	0.114	0.114	NA	NA	NA	0.316228	NA	NA	NA	NA	0.114	0.114	0.114	NA	NA	NA	0.316228	NA	NA	NA	NA	0.114	0.114	0.114	NA	NA	NA
VNG6439H	-0.0412289	-0.108554	-0.0141236	-0.0393761	0.00638	pNRC200	331582	331582	331582	0.375	0.375	0.375	36	36	36	0.09141	pNRC200	331722	331722	331722	0.356	0.356	0.356	176	176	176	0.34013	pNRC200	331752	331752	331752	0.582	0.582	0.582	206	206	206	0.316228	NA	NA	NA	NA	0.114	0.114	0.114	NA	NA	NA
VNG6441H	-0.122822	-0.126198	0.0268331	-0.0775136	0.0031555	pNRC200	331707	331582	331832	1.194	0.375	2.013	-35	-160	90	0.09141	pNRC200	331722	331722	331722	0.356	0.356	0.356	-50	-50	-50	0.364632	pNRC200	331787	331752	331822	0.584	0.582	0.586	-115	-150	-80	0.316228	NA	NA	NA	NA	0.114	0.114	0.114	NA	NA	NA
