# Supplementary material for: A Regulatory Hierarchy Controls the Dynamic Transcriptional Response to Extreme Oxidative Stress in Archaea
Source: PLoS Genet. 2015 Jan 8;11(1):e1004912. doi: 10.1371/journal.pgen.1004912 (PMC4287449; doi:10.1371/journal.pgen.1004912)
Supplement: S4 Table — Distances between RosR binding locations, each of the five TFB binding locations and associated gene identifiers. (XLS) [file pgen.1004912.s004.xls]

## Sheet: Table S4
Supplementary Table S4. Relative locations of TFB and RosR binding sites.
gene	which.TFB	rosR.ATG.dist	rosR.where	tfb.ATG.dist	tfb.where	which.TFB	dist.RosR.to.tfb (negative.if.RosR.ups.tfb)
VNG0129G	A	43.6667	upstream	38	upstream	A	-6
VNG0200C	A	8	upstream	27	upstream	A	19
VNG2196G	A	32	upstream	83	upstream	A	51
VNG2668G	A	67.5	upstream	104	upstream	A	37
VNG5135H	A	156.429	upstream	164	coding	A	-320
VNG5148H	A	0.428571	coding	2	coding	A	-2
VNG6143H	A	87.6	upstream	5	coding	A	-93
VNG6157H	A	46	coding	153	coding	A	-107
VNG6159H	A	48	upstream	77	coding	A	-125
VNG6201G	A	105.556	upstream	65	upstream	A	-41
VNG0016H	B	185.333	upstream	124	upstream	B	-61
VNG0017H	B	118.667	upstream	180	upstream	B	61
VNG0194H	B	9.66667	upstream	108	upstream	B	98
VNG0258H	B	27	upstream	6	upstream	B	-21
VNG0259G	B	85	upstream	106	upstream	B	21
VNG0285C	B	160	coding	0	upstream	B	160
VNG0734G	B	191	upstream	58	upstream	B	-133
VNG0735G	B	112	upstream	35	upstream	B	-77
VNG0985H	B	30	upstream	134	upstream	B	104
VNG1001G	B	135.125	upstream	220	upstream	B	85
VNG1088C	B	153.875	upstream	164	upstream	B	10
VNG1089G	B	150	upstream	139	upstream	B	-11
VNG1132G	B	0.285714	coding	156	upstream	B	156
VNG1137G	B	0.714286	upstream	127	upstream	B	126
VNG1262G	B	160	upstream	131	upstream	B	-29
VNG1263C	B	18	coding	11	upstream	B	29
VNG1475C	B	52	coding	208	upstream	B	260
VNG1687C	B	164	upstream	182	upstream	B	18
VNG1688C	B	228	upstream	240	upstream	B	12
VNG1835G	B	228	upstream	171	upstream	B	-57
VNG1836G	B	54.3333	coding	8	upstream	B	62
VNG2093G	B	80.6667	upstream	17	upstream	B	-64
VNG2094G	B	17.7143	upstream	109	upstream	B	91
VNG2176H	B	24.1667	upstream	19	upstream	B	-5
VNG2273H	B	104	upstream	0	upstream	B	-104
VNG2543C	B	107.857	upstream	245	upstream	B	137
VNG2544H	B	46.5	coding	83	upstream	B	130
VNG2668G	B	67.5	upstream	69	upstream	B	2
VNG5145H	B	30	upstream	242	upstream	B	212
VNG5146H	B	47.5	coding	130	upstream	B	178
VNG5197H	B	68.6667	upstream	107	coding	B	-176
VNG0194H	D	9.66667	upstream	99	upstream	D	89.3333
VNG0258H	D	27	upstream	3	upstream	D	-24
VNG0259G	D	85	upstream	109	upstream	D	24
VNG0734G	D	191	upstream	51	upstream	D	-140
VNG0985H	D	30	upstream	134	upstream	D	104
VNG1001G	D	135.125	upstream	218	upstream	D	82.875
VNG1008G	D	148	upstream	49	upstream	D	-99
VNG1088C	D	153.875	upstream	108	upstream	D	-45.875
VNG1089G	D	150	upstream	195	upstream	D	45
VNG1132G	D	0.285714	coding	172	upstream	D	172.286
VNG1137G	D	0.714286	upstream	144	upstream	D	143.286
VNG1262G	D	160	upstream	135	upstream	D	-25
VNG1263C	D	18	coding	7	upstream	D	25
VNG1688C	D	228	upstream	40	upstream	D	-188
VNG1758H	D	18.5714	upstream	8	upstream	D	-10.5714
VNG1835G	D	228	upstream	169	upstream	D	-59
VNG1836G	D	54.3333	coding	10	upstream	D	64.3333
VNG2176H	D	24.1667	upstream	22	upstream	D	-2.16667
VNG2273H	D	104	upstream	219	upstream	D	115
VNG2293G	D	19.3333	upstream	134	upstream	D	114.667
VNG2294G	D	124	upstream	9	upstream	D	-115
VNG2543C	D	107.857	upstream	245	upstream	D	137.143
VNG2544H	D	46.5	coding	83	upstream	D	129.5
VNG2668G	D	67.5	upstream	161	upstream	D	93.5
VNG5144H	D	53	upstream	48	upstream	D	-5
VNG5145H	D	30	upstream	104	upstream	D	74
VNG5197H	D	68.6667	upstream	243	upstream	D	174.333
VNG6201G	D	105.556	upstream	23	upstream	D	-82.5556
VNG0037H	F	76	upstream	32	coding	F	-108
VNG0038H	F	76	upstream	231	upstream	F	155
VNG0119H	F	32.6667	upstream	147	upstream	F	114
VNG0129G	F	43.6667	upstream	131	upstream	F	87
VNG0207H	F	163.6	coding	99	coding	F	65
VNG0258H	F	27	upstream	107	coding	F	-134
VNG0259G	F	85	upstream	219	upstream	F	134
VNG0726C	F	104	upstream	44	coding	F	-148
VNG0734G	F	191	upstream	201	upstream	F	10
VNG0735G	F	112	upstream	117	upstream	F	5
VNG1001G	F	135.125	upstream	200	upstream	F	65
VNG1008G	F	148	upstream	93	upstream	F	-55
VNG1088C	F	153.875	upstream	134	upstream	F	-20
VNG1089G	F	150	upstream	169	upstream	F	19
VNG1262G	F	160	upstream	193	upstream	F	33
VNG1263C	F	18	coding	51	coding	F	-33
VNG1271H	F	52.3333	coding	195	coding	F	-143
VNG1687C	F	164	upstream	170	upstream	F	6
VNG1698G	F	228	upstream	181	coding	F	-409
VNG1699C	F	228	upstream	43	upstream	F	-185
VNG1758H	F	18.5714	upstream	196	upstream	F	177
VNG1835G	F	228	upstream	168	upstream	F	-60
VNG1836G	F	54.3333	coding	11	upstream	F	65
VNG1890H	F	176	coding	226	coding	F	50
VNG2093G	F	80.6667	upstream	45	upstream	F	-36
VNG2094G	F	17.7143	upstream	81	upstream	F	63
VNG2273H	F	104	upstream	94	upstream	F	-10
VNG2293G	F	19.3333	upstream	56	upstream	F	37
VNG2294G	F	124	upstream	87	upstream	F	-37
VNG2543C	F	107.857	upstream	116	upstream	F	8
VNG2544H	F	46.5	coding	46	coding	F	1
VNG2668G	F	67.5	upstream	54	upstream	F	-14
VNG5145H	F	30	upstream	248	upstream	F	218
VNG5146H	F	47.5	coding	124	upstream	F	172
VNG6291H	F	61.125	upstream	4	coding	F	-65
VNG6312G	F	80.8333	upstream	0	upstream	F	-81
VNG6427H	F	184	upstream	116	upstream	F	-68
VNG6431H	F	215	coding	167	upstream	F	382
VNG6439H	F	36	upstream	10	coding	F	-46
VNG6441H	F	35	coding	136	upstream	F	171
VNG0016H	G	185.333	upstream	105	upstream	G	-80
VNG0017H	G	118.667	upstream	199	upstream	G	80
VNG0037H	G	76	upstream	7	upstream	G	-69
VNG0039H	G	73.6667	coding	13	upstream	G	87
VNG0045C	G	184	coding	163	coding	G	21
VNG0119H	G	32.6667	upstream	181	upstream	G	148
VNG0129G	G	43.6667	upstream	44	upstream	G	0
VNG0194H	G	9.66667	upstream	113	upstream	G	103
VNG0207H	G	163.6	coding	99	upstream	G	263
VNG0212H	G	24	coding	22	coding	G	2
VNG0258H	G	27	upstream	6	upstream	G	-21
VNG0259G	G	85	upstream	106	upstream	G	21
VNG0734G	G	191	upstream	65	upstream	G	-126
VNG0836H	G	63.8889	coding	172	coding	G	-108
VNG0974G	G	97	coding	6	upstream	G	103
VNG0985H	G	30	upstream	136	upstream	G	106
VNG0991H	G	235	upstream	106	upstream	G	-129
VNG1001G	G	135.125	upstream	216	upstream	G	81
VNG1088C	G	153.875	upstream	162	upstream	G	8
VNG1089G	G	150	upstream	141	upstream	G	-9
VNG1467G	G	45.5	coding	7	upstream	G	53
VNG1654G	G	46.1429	coding	25	upstream	G	71
VNG1687C	G	164	upstream	188	upstream	G	24
VNG1688C	G	228	upstream	234	upstream	G	6
VNG1835G	G	228	upstream	169	upstream	G	-59
VNG1836G	G	54.3333	coding	10	upstream	G	64
VNG2176H	G	24.1667	upstream	21	upstream	G	-3
VNG2293G	G	19.3333	upstream	9	upstream	G	-10
VNG2294G	G	124	upstream	134	upstream	G	10
VNG2543C	G	107.857	upstream	46	upstream	G	-62
VNG2668G	G	67.5	upstream	69	upstream	G	2
VNG5146H	G	47.5	coding	108	upstream	G	156
VNG6160H	G	180	coding	117	upstream	G	297
VNG6173C	G	54.5	coding	46	coding	G	9
VNG6184G	G	11	coding	160	upstream	G	171
VNG6185H	G	8	coding	22	coding	G	-14
VNG6186H	G	216	upstream	229	upstream	G	13
VNG6195H	G	238.5	coding	9	upstream	G	248
VNG6201G	G	105.556	upstream	19	upstream	G	-87
VNG6288C	G	135	upstream	5	upstream	G	-130
VNG6291H	G	61.125	upstream	47	coding	G	-108
VNG6292C	G	37	upstream	28	coding	G	-65
VNG6294G	G	104.833	upstream	21	upstream	G	-84
VNG6297C	G	184	coding	192	upstream	G	376
VNG6312G	G	80.8333	upstream	13	upstream	G	-68
VNG6313G	G	20.2	coding	87	upstream	G	107
VNG6320C	G	16	coding	8	upstream	G	24
VNG6340H	G	20	upstream	7	upstream	G	-13
VNG6343H	G	62	coding	131	upstream	G	193
